1 Title: Environment dependence of rhizobial relative fitness in the legume-rhizobia symbiosis

2

3

4 Liana T. Burghardt<sup>a,b</sup>, Brendan Epstein<sup>a</sup>, Michelle Hoge<sup>a</sup>, Diana Trujillo<sup>c</sup>, and Peter Tiffin<sup>a</sup>

5

6 <sup>a</sup>Department of Plant and Microbial Biology, University of Minnesota, St. Paul, MN 55108

7 <sup>b</sup>current affiliation Department of Plant Science, The Pennsylvania State University, University  
8 Park, Pennsylvania

9 <sup>c</sup>Department of Plant Pathology, University of Minnesota, St. Paul, MN 55108

10

11

12 *Running Title:* Environmental dependence of rhizobial fitness

13

14 *Keywords:* nitrogen addition, inoculation density, community complexity, genotype by  
15 environment, legume-rhizobia, rhizobial fitness, nodules, strain competition, host benefit

16

17 *Author for correspondence:*

18 Liana T. Burghardt

19 Department of Plant Science

20 109 Tyson Building

21 University Park, PA 16802

22 [liana.burghardt@gmail.com](mailto:liana.burghardt@gmail.com)

23 1-(814)-863-6168

24

25 *Authorship:* LTB designed the experiments, collected and analyzed data, and wrote the  
26 manuscript, BE designed the experiments, collected and analyzed data, MH and DT collected  
27 data, and PT designed the experiments, collected data, and wrote the manuscript

28

29 *Data Accessibility:* The data supporting the results of this publication and code necessary for  
30 these analyses will be archived in a Dryad repository (XXXXXX) and the raw reads have been  
31 deposited in NCBI BioProject PRJNA401437 (SRX4557823–SRX4557965).

32

33 *Supplemental Figures and Tables:*

34

35 *Abstract:*

36 Spatial and temporal variation in resource availability, population density, and composition  
37 likely affect the ecology and evolution of symbiotic interactions. We examined how host  
38 genotype, Nitrogen addition, rhizobial density, and community complexity affected a legume-  
39 rhizobia (*Medicago truncatula* - *Ensifer meliloti*) mutualism. Host genotype had the strongest  
40 effect on the size, number, and rhizobial composition of root nodules (the symbiotic organ). By  
41 contrast, the effect of small changes in N-availability and the complexity of the inoculum  
42 community (2, 3, 8, or 68 strains) were minor. Higher inoculum density resulted in a nodule  
43 community that was less diverse and more beneficial but only in the more selective host. With  
44 the less selective host, higher density resulted in more diverse and less beneficial nodule  
45 communities. Density effects on strain composition deserve additional scrutiny as they can create  
46 eco-evolutionary feedback and have translational relevance for overcoming establishment  
47 barriers in bio-inoculants.

48

49 *Short Abstract:*

50 The environmental context of the nitrogen-fixing mutualism between leguminous plants  
51 and rhizobial bacteria varies over space and time. The understudied environmental variable of  
52 rhizobial density had a larger effect on the relative fitness of 68 rhizobia (*Ensifer meliloti*) strains  
53 in nodules than the addition of low-levels of nitrogen or community complexity.

54 *Introduction:*

55       Biotic interactions have important consequences for population dynamics (Morris *et al.*  
56 2019), selection (Caruso *et al.* 2017), and local adaptation (Runquist *et al.* 2020) of interacting  
57 species. Of course, these biotic interactions do not occur in isolation and the benefits and costs  
58 of the interaction can be modified (Bronstein 1994) by population density, the presence of  
59 additional species (Wood *et al.* 2018), genetics (Ford *et al.* 2017) and abiotic factors such as  
60 resource availability (Schultz *et al.* 2001; Lau *et al.* 2014; Wurzburger & Ford 2014;  
61 Rivett *et al.* 2016) or moisture levels (Wolinska & King 2009; Louthan *et al.* 2018; Benning &  
62 Moeller 2019). These responses (*i.e.* plasticity) can evolve if there is genetic variation in traits  
63 that modify the sensitivity of an interaction to additional environmental variables such as  
64 immunity, stress tolerance, or phenology (e.g. Ramegowda & Senthil-Kumar 2015; Garrido-Oter  
65 *et al.* 2018). Here we examine how three sources of environmental variation, resource  
66 availability, rhizobia density, and rhizobial community complexity, affect the rhizobium species  
67 (*Ensifer meliloti*) as it engages in symbiosis with its leguminous host plant (*Medicago*  
68 *truncatula*).

70       Environment dependence is a recurring theme in the study of the symbiosis between  
71 legume plants and rhizobial bacteria (Heath & Tiffin 2007; Keller & Lau 2018; Burghardt 2020).  
72 In this mutualistic relationship, rhizobia convert atmospheric nitrogen (N<sub>2</sub>) into a plant-useable  
73 form to support host growth and reproduction while rhizobia gain carbon resources from the  
74 plant to support the growth and reproduction prior to release back into the soil (Denison & Kiers  
75 2011; Poole *et al.* 2018). While this relationship is commonly beneficial to the plant host (Gibert  
76 *et al.* 2018), the magnitude of these fitness benefits to the plant depends on the identity of the  
77 rhizobial strain as well as additional environmental parameters including N, P, water- and light-  
78 availability, and temperature (Larimer *et al.* 2014; Vuong *et al.* 2017; Keller & Lau 2018; Heath  
79 *et al.* 2020). Experiments in which plants are inoculated with a single rhizobial strain, often at  
80 very high density, have shown that the benefits rhizobia obtain from symbiosis also can be  
81 context dependent (e.g. Friel & Friesen 2019; Batstone *et al.* 2020). However, in natural and  
82 agricultural populations rhizobia densities are likely to vary and multiple rhizobia strains  
83 compete for nodule occupancy and host enrichment (Burghardt 2020). Results from single-strain  
84 experiments may not be directly translatable to multi-strain environments because between-strain

85 competition can strongly affect nodulation success (Triplett & Sadowsky 1992). Indeed, strain  
86 fitness proxies in single-strain environments are not strongly correlated with strain fitness in  
87 multi-strain communities (Burghardt *et al.* 2018).

88  
89         Theoretically, resource availability has the potential to shape the evolution of resource-  
90 based symbiosis (Akçay *et al.* 2011; Bever 2015). N-availability could affect selection acting on  
91 rhizobia and plant hosts via a number of mechanisms. For instance, additional N can reduce the  
92 overall frequency of associations with hosts by reducing nodule number or size (Heath & Tiffin  
93 2007; Heath *et al.* 2010; Menge *et al.* 2015). While forming fewer nodules in high N  
94 environments may have little effect on plant fitness, it certainly reduces the chances of each  
95 rhizobia associating with a legume and, if nodules remain small, also reduces the number of  
96 rhizobia released from host nodules (a major component of the fitness benefit rhizobia receive  
97 from engaging in the symbiosis). Nitrogen can also alter competitiveness among symbionts,  
98 perhaps through altering the strength of host preference (Elliott *et al.* 2009) or enrichment via  
99 host rewards/sanctions (Kiers *et al.* 2006; Oono *et al.* 2011). Despite the intuitive appeal of  
100 theoretical predictions that additional N will reduce host dependence on rhizobia and lead to  
101 relaxed selection for rhizobial host benefit, there is limited empirical support for N-mediated  
102 shifts in competitive outcomes between rhizobia. Partner choice as measured by nodule  
103 occupancy does not shift with N-addition in *Acmispon* (Regus 2014, Wendlandt *et al.* 2019) or  
104 *Medicago* (Laguerre *et al.* 2012; Grillo *et al.* 2016) and only weakly shifts in *Mimosa* (Elliott *et al.*  
105 *et al.* 2009). However, which strain initiates each nodule only represents the first stage of selection.  
106 Once nodules form, differential nodule growth and strain reproduction can allow some strains to  
107 increase in frequency relative to others, but again, studies to date suggest that N has only a  
108 limited effect on rhizobial fitness (Laguerre *et al.* 2012; Vuong *et al.* 2017).

109  
110         Unlike N-addition, the effect of rhizobial population density on the legume benefit and  
111 rhizobial fitness has received scant empirical attention. However, population densities can  
112 strongly affect the ecology and evolution of biotic interactions including hosts and pathogens  
113 (*e.g.* Schuhegger *et al.* 2006), predator and prey (*e.g.* Jaffee 2003), and plants and pollinators  
114 (*e.g.* Moeller 2004). The density of rhizobial symbionts varies over space and time. For example,  
115 twenty years of cropping system differences resulted in four-orders-of-magnitude differences in

116 rhizobia population densities:  $6.8 \times 10^6$  rhizobia  $\text{gram}^{-1}$  in soy/wheat/maize rotations,  $4.5 \times 10^5$  in  
117 continuous soy, and  $6.1 \times 10^2$  in continuous maize (Yan *et al.* 2014). There are many reasons to  
118 suspect that selection could be density dependent; the density of rhizobia in the soil could affect  
119 the number of nodules that a host forms (Oldroyd *et al.* 2001), the role of quorum sensing  
120 (Gonzalez & Marketon 2003; Sanchez-Contreras *et al.* 2007; Veliz-Vallejos *et al.* 2014), and the  
121 relative importance of host-mediated vs. soil-mediated selection (Daubech *et al.* 2017; Westhoek  
122 *et al.* 2017). Predicting the outcome of rhizobial density on strain selection is, however, difficult.  
123 For instance, when rhizobial population densities are high more nodulation sites (root hairs) will  
124 interact with multiple strains and more nodules will be formed and thus, we might expect  
125 opportunities for plant-imposed selection on bacterial populations to increase (Westhoek *et al.*  
126 2017). On the other hand, when rhizobial densities are high, plant control may decrease as traits  
127 that influence rhizobial competitiveness become more important (Triplett & Sadowsky 1992).

128

129         Much of the empirical work on legume-rhizobia symbiosis relies on single-strain  
130 inoculations, however, in nature legume hosts often form nodules with a diverse community of  
131 strains (Thies *et al.* 1991; Rangin *et al.* 2008). Microbial community complexity can affect  
132 community assembly and interactions (Billick & Case 1994). Synthetic communities are  
133 increasingly being used to query the effect of additional community members (Coward *et al.*  
134 2008; Großkopf & Soyer 2014; Widder *et al.* 2016). For example, Freidman *et al.* (2017) showed  
135 that competitive outcomes between two bacterial strains living in the guts of *C. elegans* are not  
136 affected by the presence of additional strains (Lopez *et al.* 2019). While rhizobial strain  
137 frequency in nodules is clearly dependent on the presence of other strains (Triplett & Sadowsky  
138 1992; Laguerre *et al.* 2012; Westhoek *et al.* 2017), experiments have not investigated whether  
139 pairwise competitive outcomes are affected by the presence of other strains. In other words, does  
140 strain A always beat strain B regardless of which and how many other strains are present in the  
141 community?

142

143         Here we report on the extent to which strain fitness in nodules and plant traits are affected  
144 by each of three environmental factors, N-availability, population density, and the complexity of  
145 the rhizobial community to which plants are exposed. Given previous work showing that  
146 rhizobial fitness can strongly depend on host genotype (Burghardt *et al.* 2018, 2019b, a; Gano-

147 Cohen *et al.* 2019) we examine the effect of these treatments on each of two commonly used  
148 plant genotypes. Our results indicate that host-genotype has a much greater effect on strain  
149 fitness than the environmental manipulations. Among the environmental manipulations, the  
150 effects of bacterial density were approximately twice as great as the effects of N-addition.  
151 Community complexity had little effect on the relative fitness rankings of rhizobial strains  
152 suggesting that higher-order interactions between strains are rare. Our results suggest that  
153 variation in population densities could influence ecological and evolutionary dynamics in  
154 rhizobial communities and are a factor that should be considered more explicitly in empirical,  
155 theoretical, and applied work.

156

157

## 158 **Material and methods**

159 We measured strain communities inside host nodules using a select-and-resequence  
160 approach, a variant of evolve-and-resequence approaches (Burghardt *et al.* 2018). We inoculated  
161 plants with a community of 68 rhizobial strains (hereafter referred to as C68). These strains  
162 were chosen to capture the majority of genetic variation present among 160 sequenced strains  
163 (Epstein *et al.* 2018; Nelson *et al.* 2018). To evaluate whether increasing the amount of N  
164 available to plants altered strain composition of the nodule community, we grew plants with a  
165 low level of additional N (+100ml 3mMol KNO<sub>3</sub> week<sup>-1</sup>). To evaluate the potential for rhizobia  
166 density to affect strain fitness, we inoculated plants with two rhizobial densities: low (5x10<sup>5</sup>  
167 rhizobia plant<sup>-1</sup>) and high (5x10<sup>7</sup> rhizobia plant<sup>-1</sup>). To examine the effect of community  
168 complexity, we constructed communities of nested subsets of eight, three, and all pairwise  
169 competitions of the three. To form the rhizobia communities, we grew each of 68 *E. meliloti*  
170 strains in 3ml Tryptone yeast media (6g tryptone, 3g yeast extract, 0.38g CaCl<sub>2</sub> per L) for 3 days  
171 and then combined an equal volume of each culture to generate a community (C68) with  
172 approximately equal representation of each strain (median strain frequency 0.014, range 0.009-  
173 0.02). We used the same method to form the eight (C8), three (C3), and three two-strain  
174 communities (M:H, M:K, and H:K). All strain names are list in Supplemental Figure S3.

175

176 Seeds of two host genotypes A17 var. Varma and R108 (Medicago HapMap accession  
177 numbers HM101 and HM340, Stanton-Geddes *et al.* 2013) were bleached, rinsed, scarified with

178 a razor blade, stratified on wet filter paper at 4°C in the dark for two days, and then allowed to  
179 germinate at room temperature for one day. Twelve germinated seeds were then planted in each  
180 of 45 1L pots filled with sterilized Sunshine Mix. When seedlings were three days old 100 ul of  
181 each rhizobial community diluted in 9.9 ml 0.85% NaCl w/v solution were used to inoculate  
182 each pot (approximately  $10^8$  cells, except for the low-density treatment which was inoculated  
183 with  $\sim 10^6$  cells, Figure S1). Plants were fertilized with 150ml of N-free fertilizer (Bucciarelli *et*  
184 *al.* 2006 see Burghardt *et. al.* 2018 for details) once a week and watered with sterile water as  
185 needed. Six weeks after planting, we sampled  $\sim 500$  (A17) or  $\sim 200$  (R108) nodules from the  
186 plants in each pot (Figure S2), crushed them, and used a series of differential centrifugation steps  
187 to enrich for and pellet undifferentiated bacteria (Burghardt *et al.* 2018). Pellets were stored at -  
188 20°C until we extracted DNA using the UltraClean Microbial DNA Isolation Kit (no. 12224; Mo  
189 Bio Laboratories). In addition to harvesting the nodules, we measured on a per plant basis:  
190 nodule number, nodule fresh weight, and vegetative and root biomass (dried at 60°C for 72  
191 hours).

192  
193 *Strain frequencies:* We estimated the frequency of each strain in each nodule pool using the  
194 method in Burghardt *et al.* 2018. In brief, DNA isolated from each replicate was sequenced on  
195 an Illumina HiSeq 2500 (NexteraXT libraries, 125 bp paired-end reads, 3.6-9.4 million read pairs  
196 library<sup>-1</sup>). Reads were trimmed with TrimGalore! (v0.4.1) using default settings, except with  
197 minimum read length = 100 bp, quality threshold = 30, and minimum adapter match = 3. We  
198 used bwa mem (v0.7.17; Li and Durbin, 2010) with default settings to align reads to the *E.*  
199 *meliloti* USDA1106 genome (Nelson *et al.* 2018; NCBI BioProject: PRJNA388336). We  
200 identified SNPs segregating in each of the sequenced communities using FreeBayes (v1.2.0-2-  
201 g29c4002; (Garrison & Marth 2012) with a minimum read mapping quality of 30. After cleaning  
202 and alignment, median read depth per sample was 65X (range 29X-115X). To estimate strain  
203 frequency, we used only SNPs for which every strain had an unambiguous call. We then  
204 estimated the frequency of each strain in each sample using HARP (Kessner *et al.* 2013) as  
205 described in Burghardt *et al.* (2018).

206  
207 *Nodule community measurements:* Based on strain frequencies, we calculated three nodule  
208 community metrics for each replicate: composition, diversity, and host benefit. We estimated

209 community composition as the fold change in the frequency of each strain ( $q_x$ ) in a nodule  
210 community relative to mean frequency of that strain across four sequencing replicates of the  
211 initial community (fitness =  $\log_2(q_x \text{ selected} / \bar{q}_x \text{ initial})$ ). This transformation both normalizes the  
212 frequency distribution and controls for small differences in initial strain frequency (median  $q_x$   
213  $\text{initial}=0.0092$ , 5%-95% quantile: 0.0054-0.0154). We estimated community diversity as the  
214 exponent of Shannon diversity, which we calculated using the ‘renyi’ function in vegan package  
215 of R. We calculated predicted host benefit as the sum of the per strain frequency in nodules  
216 multiplied by the dry plant weight from a single-strain inoculation experiment (data from  
217 (Burghardt *et al.* 2018):

$$218 \quad \frac{\sum_{x=1}^n q_x * \text{dry plant weight in single strain experiment}_x}{\sum_{x=1}^n q_x}$$

219 For A17 replicates we used A17 single-strain data and for R108 we used R108 single-strain data.  
220 We scaled each host-specific dataset to range from zero (complete occupancy by the least  
221 beneficial strain) to one (complete occupancy by the most beneficial strain).

222  
223 *Statistical analysis of community measures:* We used redundancy analysis (RDA, “rda” in the  
224 vegan R package Oskanen et al. 2017) and ANOVA to analyze the effects of Host genotype (H),  
225 Density (D), and Nitrogen (N) and their interactions on each of the nodule community measures.  
226 To collapse the dimensionality of the strain relative fitness data and analyze shifts in relative  
227 fitness across treatments, we used RDA. RDA fits a multivariate linear regression to centered  
228 and scaled data and then uses principal component analysis (PCA) to decompose the major axes  
229 of variation in the fitted parameters. The adjusted  $R^2$  of each RDA model provides an estimate of  
230 the proportion of variance in relative fitness explained by the model predictor(s). We permuted  
231 the data to determine the probability that fitness differences occurred by chance (‘anova’  
232 function, 999 permutations). To analyze strain diversity, we used an ANOVA (‘lm’ and ‘anova’)  
233 to test for differences amongst treatments. To analyze host benefit, we used an ANOVA (‘lm’  
234 and ‘anova’). Because the effects of D and N were host dependent (H x D, H x N interactions),  
235 we also analyzed the effects of N, D, and their interaction for each host separately.

236  
237 *Analysis of rank order and community complexity:* For each pairwise competition of the three  
238 strains used to form three-strain community (C3), we identified the strain with higher strain



239 frequency and asked if the same strain was at higher frequency in the more complex three strain  
240 community. We also examined whether strain frequency rankings in the C3 community  
241 remained the same in the eight- (C8) and sixty-eight- (C68) strain communities. Likewise, we  
242 examined whether the frequency rankings of each of the strains in the C8 community remained  
243 the same in the C68 community.

244

245 *Statistical analysis of plant phenotypes:* We used an ANOVA ('lm' and 'anova') to test for the  
246 effects of host genotype, inoculum density, and nitrogen level and their interactions on six plant  
247 traits (nodule number, average nodule weight, nodule weight per, shoot biomass, root biomass,  
248 and root to shoot ratio). The first two traits violated the assumption of homogeneity of variance  
249 between hosts, so we focus on host-specific analyses. To evaluate the effect of community  
250 complexity on plant phenotypes, we ran a model with Host (H) and community complexity (C;  
251 2, 3, 8, and 68 strains) and their interaction as continuous predictors. Although we test for the  
252 among-treatment differences in plant phenotypes, the experiments were designed to evaluate the  
253 effect of treatments on strain fitness and were not well powered to detect among-treatment  
254 differences in plant phenotypes.

255

256

## 257 **Results:**

### 258 *Host genotype has a large effect on strain fitness and nodule phenotypes*

259 Consistent with previous work, the strain composition of the nodule communities was  
260 strongly affected by host genotype. In fact, host identity had a greater effect on strain  
261 composition, Shannon's diversity, and predicted benefit of the nodule community (Figure 2,  
262 Table 1, Table S1, Table S2), than did N-addition, inoculum density, or the complexity of the  
263 inoculum community. Relative to R108, A17 hosts produced ~ 10 times more nodules (Fig 3a)  
264 that were approximately one tenth the size (Fig 3b), and harbored nodule communities that were  
265 less diverse (Fig 2b) and more beneficial (Fig 2c).

266

### 267 *N-availability weakly affected strain composition, diversity, and benefit*

268 Because Nitrogen is the primary resource rhizobia provide to their host, researchers have  
269 speculated, and modeling has suggested that N-availability could alter the relative fitness of

270 rhizobia strains. However, we found that N-availability explained only a small portion of the  
271 variance in the overall composition of the nodule communities (2.2% of the RDA variance,  
272  $p=0.23$ ; Figure 2), although the effect was slightly greater when hosts were analyzed separately  
273 (in A17  $p=0.027$ , 6.4% of the variance and in R108  $p = 0.46$ , 4.2% of the variance; Table 1). N-  
274 addition had similar magnitude of effect on the diversity (Shannon's) of the nodule community  
275 and the predicted benefit of the strain community, with the effects being greater in A17  
276 (diversity:  $p=0.039$ , 8.7% of variance and strain benefit:  $p = 0.030$ , 7.9% of variance) than R108  
277 ( $p=0.85$ , 0.17% of variance and  $p = 0.28$ , 3.2% of variance, respectively). See Table S1 and  
278 Table S2 for full results.

279

280 *Rhizobia inoculation density had a stronger effect than N-addition*

281 Inoculating plants with 100-fold less rhizobia cells caused larger changes in strain  
282 diversity and predicted benefit of the nodule community than N-addition (Figure 2). Moreover,  
283 the effect of density depended on the host. With A17 hosts, density explained 16.1% ( $p=0.001$ )  
284 of variance in community composition vs. 6.4% ( $p=0.027$ ) of the variance explained by N-  
285 addition. With R108, density explained 6.1% ( $p=0.053$ ) of the variance vs 4.2 % ( $p=0.46$ )  
286 explained by N-addition. Density affected diversity of the nodule community in opposite  
287 directions in the two hosts. Compared to the low-density inoculation, the high-density  
288 inoculation resulted in A17 nodule communities being less diverse (based on Shannon's  
289 diversity) and more beneficial (both  $p < 0.001$ ). By contrast, with R108 the low-density  
290 inoculation resulted in nodule community that was more diverse, although not greater than  
291 expected by chance ( $p = 0.78$ ) and less beneficial ( $p < 0.003$ ). See Table S1 and Table S2 for  
292 details.

293

294 *Relative fitness rankings are similar across communities of increasing complexity*

295 In nature, the complexity of rhizobial communities varies in both space and time. We  
296 found that although the absolute frequency of each of three focal strains was strongly affected by  
297 the presence of additional strains in the inoculum, we found little evidence that additional strains  
298 in the inoculum community altered strain-rankings relative to each other. In other words, with  
299 minor exceptions, the more frequent strain in pairwise competitions was also the more frequent  
300 strain in more complex communities (Table 2). The minor exceptions involved two strains

301 (KH46c and HM006.1) that had nearly equal frequencies in pairwise inoculations and also nearly  
302 equal frequency when part of more strain-rich communities (Figure S6; Table 2). Similarly the  
303 relative-frequency ranking of strains when plants were inoculated with three strains (C3) were  
304 almost always the same as the relative ranking of those strains when they were part of a 68 strain  
305 inoculum community (Figure 4a) and the relative ranking of the strains in C8 treatment were  
306 nearly always the same as they were in the C68 treatment (Figure 4b). These results suggest that  
307 strain competitiveness is relatively robust to the presence of additional strains and strains with  
308 higher frequency in pairwise competitions will also have higher frequencies in more complex  
309 communities.

310

311 *Effects of N, D, and complexity on nodule and plant traits were host specific*

312 The effect of N-addition and inoculum density on plant phenotypes were host-specific  
313 (Table S3). In A17, increased rhizobial density resulted in plants forming more nodules  
314 ( $p=0.004$ ; Fig 3a) that weighed less ( $p<0.001$ ; Fig 3b). In R108, an increase in rhizobia density  
315 resulted in plants forming more, but smaller nodules, but only in the N-addition environment  
316 (Nitrogen x Density  $p = 0.036$  &  $p = 0.033$  respectively). Neither N-addition or rhizobia density  
317 had measurable effects on either above or belowground biomass, although both N ( $p=0.029$ ) and  
318 to a lesser extent density ( $p=0.087$ ) decreased the root to shoot ratio in A17 but not in R108 (Fig  
319 S7). Complexity of the inoculum community had little effect on nodule number or vegetative  
320 biomass (Fig S8; Table S4) although it did have minor effects on nodule weight in A17 but not  
321 R108 (Host x Complexity  $p= 0.018$ ), and root weight ( $p = 0.053$ ) of both hosts.

322

323

## 324 **Discussion**

325 The symbiosis between legumes and rhizobia plays an important ecological role by  
326 contributing nitrogen to natural and agricultural ecosystems and to the success of legumes  
327 (Vitousek *et al.* 2013; Harrison *et al.* 2018; Taylor *et al.* 2020). Here we asked how host  
328 genotype and each of three environmental factors, that are likely to vary spatially and temporally  
329 affect the rhizobia community in nodules. Nitrogen, despite being the key benefit that rhizobia  
330 provide plants, had relatively small effects on the strain composition, diversity, and benefit of  
331 nodule communities. Similarly, the complexity of the inoculum community (number of strains

332 used to inoculate a plant) had only small effects on relative strain competitiveness, suggesting  
333 that higher-order interactions among strains do not alter the pairwise rankings of strain success.  
334 Interestingly, inoculum density had large and host-specific effects on the nodule community—  
335 density had a larger effect on strain composition, diversity, and benefit in the host (A17) that  
336 imposes greater selection on the rhizobia population.

337

338       Theoretically, the availability of alternative sources of the resources provided by  
339 symbiosis can alter selection on beneficial symbionts (West *et al.* 2002; Akcay *et al.* 2011; Bever  
340 2015). When mutualistic relationships are considered in a market framework, external N  
341 improves the bargaining power of the host and increases the relative fitness of less beneficial  
342 strains (Akcay *et al.* 2011). Similarly, relaxed selection for symbiont benefit could occur because  
343 it is less costly for the host to allocate resources to a less beneficial partner if it can obtain the  
344 resource from an alternative source (Bever 2015). Despite the potential, we found the addition of  
345 small amounts of N had little effect on rhizobial strain composition, diversity, and the host  
346 benefits of the nodule community. Indeed, in one host genotype (A17), selection for beneficial  
347 strains was stronger, not weaker, in the N-addition environment. Our findings of subtle effects  
348 of N-addition are consistent with several other studies of nodule occupancy (Kosslak & Bohlool  
349 1985; Laguerre *et al.* 2012; Regus *et al.* 2014; Grillo *et al.* 2016; Wendlandt *et al.* 2019).  
350 Similarly, our results align with two previous studies that assessed composite strain fitness across  
351 all nodules formed by a plant. Nitrogen addition did not affect rhizobial composition in pools of  
352 4-week-old *Medicago* nodules inoculated with a mixture of two *Ensifer* species or a mixture of  
353 Fix- and Fix+ strains (Laguerre *et al.* 2012) and had weak effects on strain fitness two species of  
354 *Acacia*—drought and phosphorous addition treatments had larger effects (Vuong *et al.* 2017).

355

356       Although our results are consistent with these short-term (single growing season) studies,  
357 it is clear that addition of N over longer periods of time can affect the symbiosis. Many legumes  
358 regulate nodule formation and symbiotic nitrogen fixation when high levels of abiotic N are  
359 available, presumably reflecting a cost of forming and maintaining the symbiosis—(Menge *et al.*  
360 2015). For instance, Weese *et al.* found rhizobia in a grassland community to be less beneficial  
361 to hosts after 22 years of N addition (Weese *et al.* 2015; Klinger *et al.* 2016). One way to  
362 reconcile discrepancies between short and long-term experiments is to note that even if relative

363 fitness is not altered by N- addition other parameters that influence absolute fitness could  
364 change. For instance, reductions in host population sizes, nodule numbers, or nodule size could  
365 all increase the importance of rhizobial adaptation to environments external to the host and result  
366 in a population of strains with reduced host benefit via selective tradeoffs or drift (Denison &  
367 Kiers 2004; Heath & Stinchcombe 2014; Hollowell *et al.* 2016; Burghardt *et al.* 2018; Burghardt  
368 2020). Experiments that hold relative fitness constant while varying absolute fitness and vice  
369 versa will clarify the key drivers of evolutionary trajectories in response to N.

370

371         Whereas the effects of N on the legume-rhizobial symbiosis has been the focus of many  
372 studies, the potential for density-dependent selection shaping legume-rhizobia symbiosis has  
373 received scant attention. Nevertheless, rhizobial density varies widely in nature (e.g.  $10^2$  -  $10^6$  per  
374 gram Yan *et al.* 2014). The 100-fold difference in inoculum density we examined resulted in  
375 host-dependent shifts in the composition of the nodule community, with increased density  
376 resulting in more beneficial strains being favored in one host and less beneficial strains being  
377 favored in the other host. The results raise questions about the generality of laboratory  
378 experiments that rely on extremely high densities of rhizobia—presumably to ensure that hosts  
379 will not be rhizobia limited. Interestingly, while the majority of nodules screened in the field  
380 tend to have a single occupant (Kosslak & Bohlool 1985; Moawad & Schmidt 1987; Ndungu *et al.*  
381 *et al.* 2018), the probability of one nodule being infected by multiple strains increases with  
382 rhizobial density (Daubech *et al.* 2017; Westhoek *et al.* 2017). Whether strain competition occurs  
383 via direct interactions within a nodule vs. competition between nodules inhabited by different  
384 strains can affect mechanisms of rewards/sanction and the scale at which selection occurs  
385 (Akçay 2015).

386

387         The two host genotypes differed markedly in the characteristics of the nodules they  
388 produced, A17 made many small nodules while R108 made a few large nodules, a pattern found  
389 in all nitrogen, density, and inoculum environments. Interestingly, overall investment in nodule  
390 tissue per plant was very similar for both hosts, and decreases in nodule numbers at low  
391 inoculum densities were offset by increases in nodule size (a pattern previously observed by  
392 Singleton & Tavares 1986). In R108 plants, the combination of lower nodule number and low  
393 selectivity resulted in increased variability in strain fitness amongst replicates. Increased

394 stochasticity in strain fitness could influence rhizobial evolution—not by directly determining  
395 rhizobial fitness—but because it determines the strength of drift.

396

397 *Conclusions:*

398         Using a high-throughput methodology, we evaluated the context-dependence of host-  
399 dependent strain fitness in legume-rhizobia symbiosis. Our finding that host genetic variation is  
400 a consistent driver of rhizobial relative fitness across environmental perturbations suggests it is  
401 possible to identify the genomic basis of strain x host interactions (Wang *et al.* 2012, 2018;  
402 Gourion & Alunni 2018) and use that information to breed legume crops that associate with  
403 beneficial rhizobial strains even when environmental conditions change across years or locations.  
404 Our results also suggest that host-imposed selection might depend on the density of the rhizobia  
405 population in the soil. From a translational perspective, understanding density-dependent  
406 selection could aid in the developing of beneficial inoculants that overcome establishment  
407 barriers (Kaminsky *et al.* 2019).

408

409

410 **Acknowledgements:** We thank Roxanne Denny for help with seeds. Computational resources  
411 were provided by the Minnesota Supercomputing Institute (MSI) at the University of  
412 Minnesota. This work was supported by the National Science Foundation (NSF) awards IOS-  
413 1724993 and IOS-1856744. Any opinions, findings, conclusions, or recommendations expressed  
414 in this material are those of the authors and do not necessarily reflect the views of the NSF.

415 **References:**

- 416 Akçay, E. (2015). Evolutionary models of mutualism. In: *Mutualism* (ed. Bronstein, J.L.).  
417 Oxford University Press, New York, NY, pp. 57–76.
- 418 Akçay, E., Simms, E.L., Akçay, E., Simms, E.L., Akçay, E. & Simms, E.L. (2011). Negotiation,  
419 sanctions, and context dependency in the legume-rhizobium mutualism. *Am. Nat.*, 178, 1–  
420 14.
- 421 Batstone, R.T., Peters, M.A.E., Simonsen, A.K., Stinchcombe, J.R. & Frederickson, M.E.  
422 (2020). Environmental variation impacts trait expression and selection in the legume–  
423 rhizobium symbiosis. *Am. J. Bot.*, 107, 195–208.
- 424 Benning, J.W. & Moeller, D.A. (2019). Maladaptation beyond a geographic range limit driven  
425 by antagonistic and mutualistic biotic interactions across an abiotic gradient. *Evolution (N.*  
426 *Y.)*, 73, 2044–2059.
- 427 Bever, J.D. (2015). Preferential allocation, physio-evolutionary feedbacks, and the stability and  
428 environmental patterns of mutualism between plants and their root symbionts. *New Phytol.*,  
429 205, 1503–1514.
- 430 Billick, I. & Case, T.J. (1994). Higher order interactions in ecological communities: What are  
431 they and how can they be detected? *Ecology*, 75, 1529–1543.
- 432 Bronstein, J.L. (1994). Conditional outcomes in mutualistic interactions. *Trends Ecol. Evol.*, 9,  
433 214–217.
- 434 Bucciarelli, B., Hanan, J., Palmquist, D. & Vance, C. (2006). A standardized method for analysis  
435 of *Medicago truncatula* phenotypic development. *Plant Physiol.*, 142, 207–219.
- 436 Burghardt, L.T. (2020). Evolving together, evolving apart: measuring the fitness of rhizobial  
437 bacteria in and out of symbiosis with leguminous plants. *New Phytol.*, 228, 28–34.
- 438 Burghardt, L.T., Epstein, B., Guhlin, J., Nelson, M.S., Taylor, M.R., Young, N.D., *et al.* (2018).  
439 Select and resequence reveals relative fitness of bacteria in symbiotic and free-living  
440 environments. *Proc. Natl. Acad. Sci.*, 115, 2425–2430.
- 441 Burghardt, L.T., Epstein, B. & Tiffin, P. (2019a). Legacy of prior host and soil selection on  
442 rhizobial fitness in planta. *Evolution (N. Y.)*, 73, 2013–2023.
- 443 Burghardt, L.T., Trujillo, D.I., Epstein, B., Tiffin, P. & Young, N.D. (2019b). A “Select and  
444 Resequence” approach reveals strain-specific effects of *Medicago* nodule-specific PLAT-  
445 domain genes. *Plant Physiol.*, 182, 463–471.

- 446 Caruso, C.M., Martin, R.A., Sletvold, N., Morrissey, M.B., Wade, M.J., Augustine, K.E., *et al.*  
447 (2017). What are the environmental determinants of phenotypic selection? A meta-analysis  
448 of experimental studies. *Am. Nat.*, 190, 363–376.
- 449 Coward, C., Van Diemen, P.M., Conlan, A.J.K., Gog, J.R., Stevens, M.P., Jones, M.A., *et al.*  
450 (2008). Competing isogenic *Campylobacter* strains exhibit variable population structures in  
451 vivo. *Appl. Environ. Microbiol.*, 74, 3857–3867.
- 452 Daubech, B., Remigi, P., Doin de Moura, G., Marchetti, M., Pouzet, C., Auriac, M.-C., *et al.*  
453 (2017). Spatio-temporal control of mutualism in legumes helps spread symbiotic nitrogen  
454 fixation. *Elife*, 6, 1–21.
- 455 Denison, R.F. & Kiers, E.T. (2004). Lifestyle alternatives for rhizobia: Mutualism, parasitism,  
456 and forgoing symbiosis. *FEMS Microbiol. Lett.*, 237, 187–193.
- 457 Denison, R.F. & Kiers, E.T. (2011). Life histories of symbiotic rhizobia and mycorrhizal fungi.  
458 *Curr. Biol.*, 21, R775–R785.
- 459 Elliott, G.N., Chou, J.H., Chen, W.M., Bloemberg, G. V., Bontemps, C., Martínez-Romero, E.,  
460 *et al.* (2009). *Burkholderia* spp. are the most competitive symbionts of *Mimosa*, particularly  
461 under N-limited conditions. *Environ. Microbiol.*, 11, 762–778.
- 462 Epstein, B., Abou-Shanab, R.A.I., Shamseldin, A., Taylor, M.R., Guhlin, J., Burghardt, L.T., *et*  
463 *al.* (2018). Genome-wide association analyses in the model rhizobium *Ensifer meliloti*.  
464 *mSphere*, 3, 1–15.
- 465 Ford, S.A., Williams, D., Paterson, S. & King, K.C. (2017). Co-evolutionary dynamics between  
466 a defensive microbe and a pathogen driven by fluctuating selection. *Mol. Ecol.*, 26, 1778–  
467 1789.
- 468 Friedman, J., Higgins, L.M. & Gore, J. (2017). Community structure follows simple assembly  
469 rules in microbial microcosms. *Nat. Ecol. Evol.*, 1, 1–7.
- 470 Friel, C.A. & Friesen, M.L. (2019). Legumes Modulate Allocation to Rhizobial Nitrogen  
471 Fixation in Response to Factorial Light and Nitrogen Manipulation. *Front. Plant Sci.*, 10, 1–  
472 9.
- 473 Gano-Cohen, K.A., Wendlandt, C.E., Stokes, P.J., Blanton, M.A., Quides, K.W., Zomorrodian,  
474 A., *et al.* (2019). Interspecific conflict and the evolution of ineffective rhizobia. *Ecol. Lett.*,  
475 22, 914–924.
- 476 Garrido-Oter, R., Nakano, R.T., Dombrowski, N., Ma, K.W., McHardy, A.C. & Schulze-Lefert,



- 477 P. (2018). Modular traits of the *Rhizobiales* root microbiota and their evolutionary  
478 relationship with symbiotic rhizobia. *Cell Host Microbe*, 24, 155-167.e5.
- 479 Garrison, E. & Marth, G. (2012). Haplotype-based variant detection from short-read sequencing.  
480 *arXiv:1207.3907*, 1–9.
- 481 Gibert, A., Tozer, W. & Westoby, M. (2018). Plant performance response to eight different types  
482 of symbiosis. *New Phytol.*, 222, 526–542.
- 483 Gonzalez, J.E. & Marketon, M.M. (2003). Quorum sensing in nitrogen-fixing rhizobia.  
484 *Microbiol. Mol. Biol. Rev.*, 67, 574–592.
- 485 Gourion, B. & Alunni, B. (2018). Strain-specific symbiotic genes: A new level of control in the  
486 intracellular accommodation of rhizobia within legume nodule cells. *Mol. Plant-Microbe*  
487 *Interact.*, 31, MPMI-01-18-0010.
- 488 Grillo, M.A., Stinchcombe, J.R. & Heath, K.D. (2016). Nitrogen addition does not influence pre-  
489 infection partner choice in the legume-rhizobium symbiosis. *Am. J. Bot.*, 103, 1763–1770.
- 490 Großkopf, T. & Soyer, O.S. (2014). Synthetic microbial communities. *Curr. Opin. Microbiol.*,  
491 18, 72–77.
- 492 Harrison, T.L., Simonsen, A.K., Stinchcombe, J.R. & Frederickson, E. (2018). More partners ,  
493 more ranges : generalist legumes spread more easily around the globe.
- 494 Heath, K.D., Podowski, J.C., Heniff, S., Klinger, C.R., Burke, P. V., Weese, D.J., *et al.* (2020).  
495 Light availability and rhizobium variation interactively mediate the outcomes of legume–  
496 rhizobium symbiosis. *Am. J. Bot.*, 107, 229–238.
- 497 Heath, K.D. & Stinchcombe, J.R. (2014). Explaining mutualism variation: A new evolutionary  
498 paradox? *Evolution (N. Y.)*, 68, 309–317.
- 499 Heath, K.D., Stock, A.J. & Stinchcombe, J.R. (2010). Mutualism variation in the nodulation  
500 response to nitrate. *J. Evol. Biol.*, 23, 2494–2500.
- 501 Heath, K.D. & Tiffin, P. (2007). Context dependence in the coevolution of plant and rhizobial  
502 mutualists. *Proc. R. Soc. London B Biol. Sci.*, 274, 1905–1912.
- 503 Hollowell, A.C., Regus, J.U., Turissini, D., Gano-Cohen, K.A., Bantay, R., Bernardo, A., *et al.*  
504 (2016). Metapopulation dominance and genomic-island acquisition of *Bradyrhizobium* with  
505 superior catabolic capabilities. *Proc. R. Soc. London B Biol. Sci.*, 283.
- 506 Jaffee, B.A. (2003). Correlations between most probable number and activity of nematode-  
507 trapping fungi. *Phytopathology*, 93, 1599–1605.

- 508 Kaminsky, L.M., Trexler, R. V., Malik, R.J., Hockett, K.L. & Bell, T.H. (2019). The inherent  
509 conflicts in developing soil microbial inoculants. *Trends Biotechnol.*, 37, 140–151.
- 510 Keller, K.R. & Lau, J.A. (2018). When mutualisms matter: Rhizobia effects on plant  
511 communities depend on host plant population and soil nitrogen availability. *J. Ecol.*, 106,  
512 1046–1056.
- 513 Kessner, D., Turner, T.L. & Novembre, J. (2013). Maximum likelihood estimation of  
514 frequencies of known haplotypes from pooled sequence data. *Mol. Biol. Evol.*, 30, 1145–  
515 1158.
- 516 Kiers, E.T., Rousseau, R.A. & Denison, R.F. (2006). Measured sanctions: Legume hosts detect  
517 quantitative variation in rhizobium cooperation and punish accordingly. *Evol. Ecol. Res.*, 8,  
518 1077–1086.
- 519 Klinger, C.R., Lau, J.A. & Heath, K.D. (2016). Ecological genomics of mutualism decline in  
520 nitrogen-fixing bacteria. *Proc. R. Soc. B Biol. Sci.*, 283, 20152563.
- 521 Kosslak, R.M. & Bohlool, B. Ben. (1985). Influence of environmental factors on interstrain  
522 competition in *Rhizobium japonicum*. *Appl. Environ. Microbiol.*, 49, 1128–1133.
- 523 Laguerre, G., Heulin-Gotty, K., Brunel, B., Klonowska, A., Le Quéré, A., Tillard, P., *et al.*  
524 (2012). Local and systemic N signaling are involved in *Medicago truncatula* preference for  
525 the most efficient *Sinorhizobium* symbiotic partners. *New Phytol.*, 195, 437–449.
- 526 Larimer, A.L., Clay, K. & Bever, J.D. (2014). Synergism and context dependency of interactions  
527 between arbuscular mycorrhizal fungi and rhizobia with a prairie legume. *Ecology*, 95,  
528 1045–1054.
- 529 Lau, J.A., Shaw, R.G., Reich, P.B. & Tiffin, P. (2014). Indirect effects drive evolutionary  
530 responses to global change. *New Phytol.*, 201, 335–343.
- 531 Li, H. & Durbin, R. (2009). Fast and accurate long-read alignment with Burrows-Wheeler  
532 transform. *Bioinformatics*, 25, 1754–1760.
- 533 Lopez, A.O., Vega, N.M. & Gore, J. (2019). Interspecies bacterial competition determines  
534 community assembly in the *C. elegans* intestine. *bioRxiv*, 535633.
- 535 Louthan, A.M., Pringle, R.M., Goheen, J.R., Palmer, T.M., Morris, W.F. & Doak, D.F. (2018).  
536 Aridity weakens population-level effects of multiple species interactions on *Hibiscus*  
537 *meyeri*. *Proc. Natl. Acad. Sci. U. S. A.*, 115, 543–548.
- 538 Menge, D.N.L., Wolf, A. a. & Funk, J.L. (2015). Diversity of nitrogen fixation strategies in

- 539 Mediterranean legumes. *Nat. Plants*, 1, 15064.
- 540 Moawad, M. & Schmidt, E.L. (1987). Occurrence and nature of mixed infections in nodules of  
541 field-grown soybeans (*Glycine max*). *Biol. Fertil. Soils*, 5, 112–114.
- 542 Moeller, D.A. (2004). Facilitative interactions among plants via shared pollinators. *Ecology*, 85,  
543 3289–3301.
- 544 Morris, W., Ehrlén, J., Dahlgren, J.P., Loomis, A.K. & Louthan, A.M. (2019). Biotic and  
545 anthropogenic forces rival climatic/abiotic factors in determining global plant population  
546 growth and fitness. *Proc. Natl. Acad. Sci.*, 1–6.
- 547 Ndungu, S.M., Messmer, M.M., Ziegler, D., Thuita, M., Vanlauwe, B., Frossard, E., *et al.*  
548 (2018). Evaluation of MALDI-TOF mass spectrometry for the competitiveness analysis of  
549 selected indigenous cowpea (*Vigna unguiculata L. Walp.*) Bradyrhizobium strains from  
550 Kenya. *Appl. Microbiol. Biotechnol.*, 102, 5265–5278.
- 551 Nelson, M., Guhlin, J., Epstein, B., Tiffin, P. & Sadowsky, M.J. (2018). The complete replicons  
552 of 16 *Ensifer meliloti* strains offer insights into intra- and inter-replicon gene transfer,  
553 transposon-associated loci, and repeat elements. *Microb. Genomics*, 4, 1–11.
- 554 Oldroyd, G.E.D., Mitra, R.M., Wais, R.J. & Long, S.R. (2001). Evidence for structurally specific  
555 negative feedback in the nod factor signal transduction pathway. *Plant J.*, 28, 191–199.
- 556 Oono, R., Anderson, C.G. & Denison, R.F. (2011). Failure to fix nitrogen by non-reproductive  
557 symbiotic rhizobia triggers host sanctions that reduce fitness of their reproductive  
558 clonemates. *Proc. Biol. Sci.*, 278, 2698–703.
- 559 Oskanen, J., Blanchet, F., Friendly, M., Kindt, R., Legendre, P., McGlenn, D., *et al.* (2017).  
560 *vegan: Community Ecology Package*.
- 561 Poole, P., Ramachandran, V. & Terpolilli, J. (2018). Rhizobia: from saprophytes to  
562 endosymbionts. *Nat. Rev. Microbiol.*, 16, 291–303.
- 563 Ramegowda, V. & Senthil-Kumar, M. (2015). The interactive effects of simultaneous biotic and  
564 abiotic stresses on plants: Mechanistic understanding from drought and pathogen  
565 combination. *J. Plant Physiol.*, 176, 47–54.
- 566 Rangin, C., Brunel, B., Cleyet-Marel, J.C., Perrineau, M.M. & Béna, G. (2008). Effects of  
567 *Medicago truncatula* genetic diversity, rhizobial competition, and strain effectiveness on the  
568 diversity of a natural *Sinorhizobium* species community. *Appl. Environ. Microbiol.*, 74,  
569 5653–5661.

- 570 Regus, J.U., Gano, K.A., Hollowell, A.C. & Sachs, J.L. (2014). Efficiency of partner choice and  
571 sanctions in *Lotus* is not altered by nitrogen fertilization. *Proc. R. Soc. B Biol. Sci.*, 281, 1–  
572 8.
- 573 Rivett, D.W., Scheuerl, T., Culbert, C.T., Mombrikotb, S.B., Johnstone, E., Barraclough, T.G., *et*  
574 *al.* (2016). Resource-dependent attenuation of species interactions during bacterial  
575 succession. *ISME J.*, 10, 2259–2268.
- 576 Runquist, R.D.B., Gorton, A.J., Yoder, J.B., Deacon, N.J., Grossman, J.J., Kothari, S., *et al.*  
577 (2020). Context dependence of local adaptation to abiotic and biotic environments: A  
578 quantitative and qualitative synthesis. *Am. Nat.*, 195, 412–431.
- 579 Sanchez-Contreras, M., Bauer, W.D., Gao, M., Robinson, J.B. & Downie, J.A. (2007). Quorum-  
580 sensing regulation in rhizobia and its role in symbiotic interactions with legumes. *Philos.*  
581 *Trans. R. Soc. B Biol. Sci.*, 362, 1149–1163.
- 582 Schuegger, R., Ihring, A., Gantner, S., Bahnweg, G., Knappe, C., Vogg, G., *et al.* (2006).  
583 Induction of systemic resistance in tomato by N-acyl-L-homoserine lactone-producing  
584 rhizosphere bacteria. *Plant, Cell Environ.*, 29, 909–918.
- 585 Schultz, P.A., Michael Miller, R., Jastrow, J.D., Rivetta, C. V. & Bever, J.D. (2001). Evidence of  
586 a mycorrhizal mechanism for the adaptation of *Andropogon gerardii* (*Poaceae*) to high- and  
587 low-nutrient prairies. *Am. J. Bot.*, 88, 1650–1656.
- 588 Singleton, P.W. & Tavares, J.W. (1986). Inoculation response of legumes in relation to the  
589 number and effectiveness of indigenous rhizobium populations. *Appl. Environ. Microbiol.*,  
590 51, 1013–1018.
- 591 Taylor, B.N., Simms, E.L. & Komatsu, K.J. (2020). More than a functional group: Diversity  
592 within the legume-rhizobia mutualism and its relationship with ecosystem function.  
593 *Diversity*, 12.
- 594 Thies, J.E., Singleton, P.W. & Bohlool, B.B. (1991). Influence of the size of indigenous rhizobial  
595 populations on establishment and symbiotic performance of introduced rhizobia on field-  
596 grown legumes. *Appl. Environ. Microbiol.*, 57, 19–28.
- 597 Triplett, E.W. & Sadowsky, M. (1992). Genetics of competition for nodulation of legumes.  
598 *Annu. Rev. Microbiol.*, 46, 399–428.
- 599 Veliz-Vallejos, D.F., Van Noorden, G.E., Yuan, M. & Mathesius, U. (2014). A *Sinorhizobium*  
600 *meliloti*-specific N-acyl homoserine lactone quorum-sensing signal increases nodule

- 601 numbers in *Medicago truncatula* independent of autoregulation. *Front. Plant Sci.*, 5, 1–13.
- 602 Vitousek, P.M., Menge, D.N.L., Reed, S.C., Cleveland, C.C. & Vitousek, P.M. (2013).
- 603 Biological nitrogen fixation : rates , patterns and ecological controls in terrestrial
- 604 ecosystems.
- 605 Vuong, H.B., Thrall, P.H. & Barrett, L.G. (2017). Host species and environmental variation can
- 606 influence rhizobial community composition. *J. Ecol.*, 105, 540–548.
- 607 Wang, D., Yang, S., Tang, F. & Zhu, H. (2012). Symbiosis specificity in the legume – rhizobial
- 608 mutualism, 14, 334–342.
- 609 Wang, Q., Liu, J., Li, H., Yang, S., Körmöczi, P., Kereszt, A., *et al.* (2018). Nodule-specific
- 610 cysteine-rich peptides negatively regulate nitrogen-fixing symbiosis in a strain-specific
- 611 manner in *Medicago truncatula*. *Mol. Plant-Microbe Interact.*, 31, 240–248.
- 612 Weese, D.J., Heath, K.D., Dentinger, B.T.M. & Lau, J.A. (2015). Long-term nitrogen addition
- 613 causes the evolution of less-cooperative mutualists. *Evolution (N. Y.)*, 69, 631–642.
- 614 Wendlandt, C.E., Regus, J.U., Gano-Cohen, K.A., Hollowell, A.C., Quides, K.W., Lyu, J.Y., *et*
- 615 *al.* (2019). Host investment into symbiosis varies among genotypes of the legume
- 616 *Acmispon strigosus* , but host sanctions are uniform. *New Phytol.*, 221, 446–458.
- 617 West, S.A., Toby Kiers, E., Pen, I. & Denison, R.F. (2002). Sanctions and mutualism stability:
- 618 When should less beneficial mutualists be tolerated? *J. Evol. Biol.*, 15, 830–837.
- 619 Westhoek, A., Field, E., Rehling, F., Mulley, G., Webb, I., Poole, P.S., *et al.* (2017). Policing the
- 620 legume-rhizobium symbiosis: A critical test of partner choice. *Sci. Rep.*, 7, 1–10.
- 621 Widder, S., Allen, R.J., Pfeiffer, T., Curtis, T.P., Wiuf, C., Sloan, W.T., *et al.* (2016). Challenges
- 622 in microbial ecology: Building predictive understanding of community function and
- 623 dynamics. *ISME J.*
- 624 Wolinska, J. & King, K.C. (2009). Environment can alter selection in host-parasite interactions.
- 625 *Trends Parasitol.*, 25, 236–244.
- 626 Wood, C.W., Pilkington, B.L., Vaidya, P., Biel, C. & Stinchcombe, J.R. (2018). Genetic conflict
- 627 with a parasitic nematode disrupts the legume-rhizobia mutualism. *Evol. Lett.*, 2, 233–245.
- 628 Wurzburger, N. & Ford Miniat, C. (2014). Drought enhances symbiotic dinitrogen fixation and
- 629 competitive ability of a temperate forest tree. *Oecologia*, 174, 1117–1126.
- 630 Yan, J., Han, X.Z., Ji, Z.J., Li, Y., Wang, E.T., Xie, Z.H., *et al.* (2014). Abundance and diversity
- 631 of soybean-nodulating rhizobia in black soil are impacted by land use and crop

632 management. *Appl. Environ. Microbiol.*, 80, 5394–5402.

633

634 Table 1: PERMANOVA on RDA of strain relative fitness shows effects of plant host and  
635 inoculum density are far stronger than effects of nitrogen (top). Analyses of each host separately  
636 (bottom) revealed that density and nitrogen both had greater effects with A17 than R108 hosts  
637

| <b>Model and Terms</b>                | <b>DF</b> | <b>Prop. Var</b> | <b>F</b> | <b>P</b>          |
|---------------------------------------|-----------|------------------|----------|-------------------|
| <b>Both Hosts</b> (adj. $r^2= 0.29$ ) |           |                  |          |                   |
| Host                                  | 1         | 0.24             | 16.06    | <b>&lt; 0.001</b> |
| Density                               | 1         | 0.047            | 3.1      | <b>0.004</b>      |
| Nitrogen                              | 1         | 0.022            | 1.44     | 0.12              |
| Host x Density                        | 1         | 0.033            | 2.19     | <b>0.022</b>      |
| Host x Nitrogen                       | 1         | 0.02             | 1.33     | 0.18              |
| Density x Nitrogen                    | 1         | 0.017            | 1.12     | 0.28              |
| Host x Density x Nitrogen             | 1         | 0.015            | 0.96     | 0.41              |
| Residual                              | 40        | 0.60             |          |                   |
| <hr/>                                 |           |                  |          |                   |
| <b>A17 only</b> (adj. $r^2= 0.14$ )   |           |                  |          |                   |
| Density                               | 1         | 0.16             | 4.3      | <b>&lt; 0.001</b> |
| Nitrogen                              | 1         | 0.064            | 1.72     | <b>0.027</b>      |
| Density x Nitrogen                    | 1         | 0.027            | 0.71     | 0.86              |
| Residual                              | 20        | 0.75             |          |                   |
| <hr/>                                 |           |                  |          |                   |
| <b>R108 only</b> (adj. $r^2= 0.024$ ) |           |                  |          |                   |
| Density                               | 1         | 0.061            | 1.43     | 0.055             |
| Nitrogen                              | 1         | 0.042            | 0.98     | 0.46              |
| Density x Nitrogen                    | 1         | 0.049            | 1.14     | 0.26              |
| Residual                              | 20        | 0.85             |          |                   |

638 Note: Nitrogen was retained as a term in the sub-models because host values and variances were  
639 so divergent from each other.

640 Table 2: Rankings of strain frequencies in two strain communities were consistant across  
641 increasingly complex communities: three strains (C3), eight strains (C8), and 68 strains (C68).  
642 The higher frequency strain is shown in bold followed by the proportion of replicates in which  
643 the higher frequency strain also had higher relative frequency in the more complex communitites.  
644

| Host | Pairwise Community     | Pairwise strain frequency | C3 (5 reps) | C8 (5 reps) | C68 (6 reps) |
|------|------------------------|---------------------------|-------------|-------------|--------------|
| A17  | <b>HM006.1</b> : KH46c | <b>0.79</b> : 0.21        | 1           | 1           | 1            |
|      | M162 : <b>HM006.1</b>  | 0.01 : <b>0.99</b>        | 1           | 1           | 1            |
|      | M162 : <b>KH46c</b>    | 0.01 : <b>0.99</b>        | 1           | 1           | 1            |
| R108 | <b>HM006.1</b> : KH46c | <b>0.56</b> : 0.44        | 0.83        | 0.66        | 1            |
|      | M162 : <b>HM006.1</b>  | 0.01 : <b>0.99</b>        | 1           | 1           | 1            |
|      | M162 : <b>KH46c</b>    | 0.01 : <b>0.99</b>        | 1           | 1           | 1            |

645  
646



647 Figure 1: Design of the Nitrogen x Density (a)  
 648 and Community complexity (b) experiments  
 649 and traits measured on strains or plants in  
 650 both experiments (c). All plants were  
 651 harvested ~6 weeks after planting. Inoculation  
 652 density is given per plant (~10 plants per pot).  
 653 Colored stacked bars represent strain  
 654 frequencies in each of six initial communities  
 655 of 68 strains (C68- six replicate pots for each  
 656 N\*D treatment), 8 strains (C8- five reps), 3  
 657 strains (C3- five reps), and 2 strain pairwise  
 658 competitions (M:H, H:K, M:K-four reps  
 659 each).  
 660  
 661

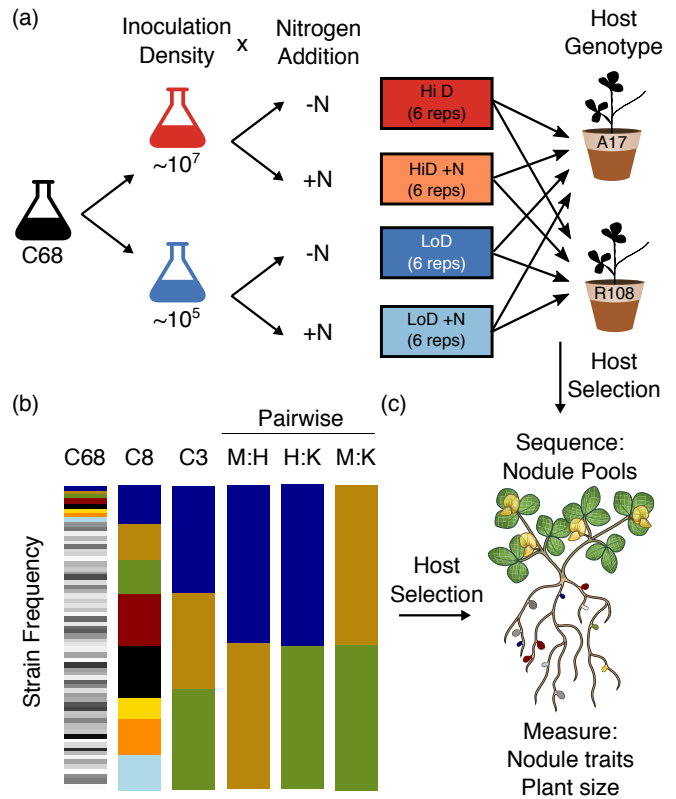

662 Figure 2: Host genotype and inoculum  
663 density affected rhizobia strain community  
664 characteristics. a) Host genotype, density,  
665 and their interaction all contributed to  
666 variation in strain composition in nodules  
667 (percent contribution is in parenthesis,  
668 Table 1, Figure S4 for RDA analysis by  
669 host genotype). b) Shannon's diversity  
670 decreased (i.e. stronger selection) at high  
671 densities ( $p < .001$ ) and high nitrogen  
672 ( $p = 0.039$ ) in A17. R108 nodules were  
673 always more diverse than A17 ( $p < 0.001$ )  
674 regardless of density or nitrogen (Table S2  
675 for full model) (c) N-addition had little  
676 effect on the predicted benefit of nodule  
677 communities. However, predicted benefit  
678 significantly increased at high densities in  
679 A17 ( $p < 0.001$ ) and significantly decreased  
680 in R108 ( $p = 0.003$ , full results in Table S3).

681  
682  
683

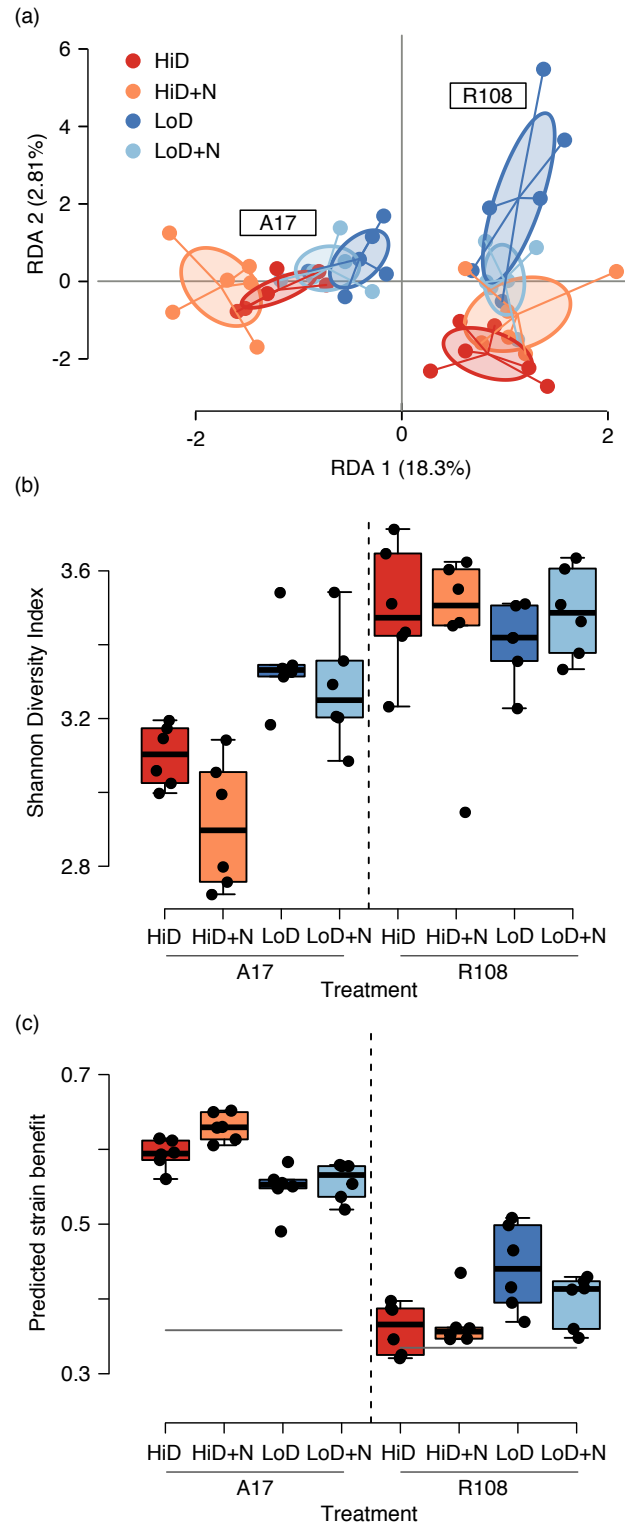

684 Figure 3: Nodule traits in Density and  
685 Nitrogen treatments. Hosts produced very  
686 different numbers (a) and sizes (b) of  
687 nodules but a similar overall weight (c)  
688 across treatments. At low inoculation  
689 densities, nodule number decreased and  
690 nodule weight increased (full results in  
691 Table S2).  
692

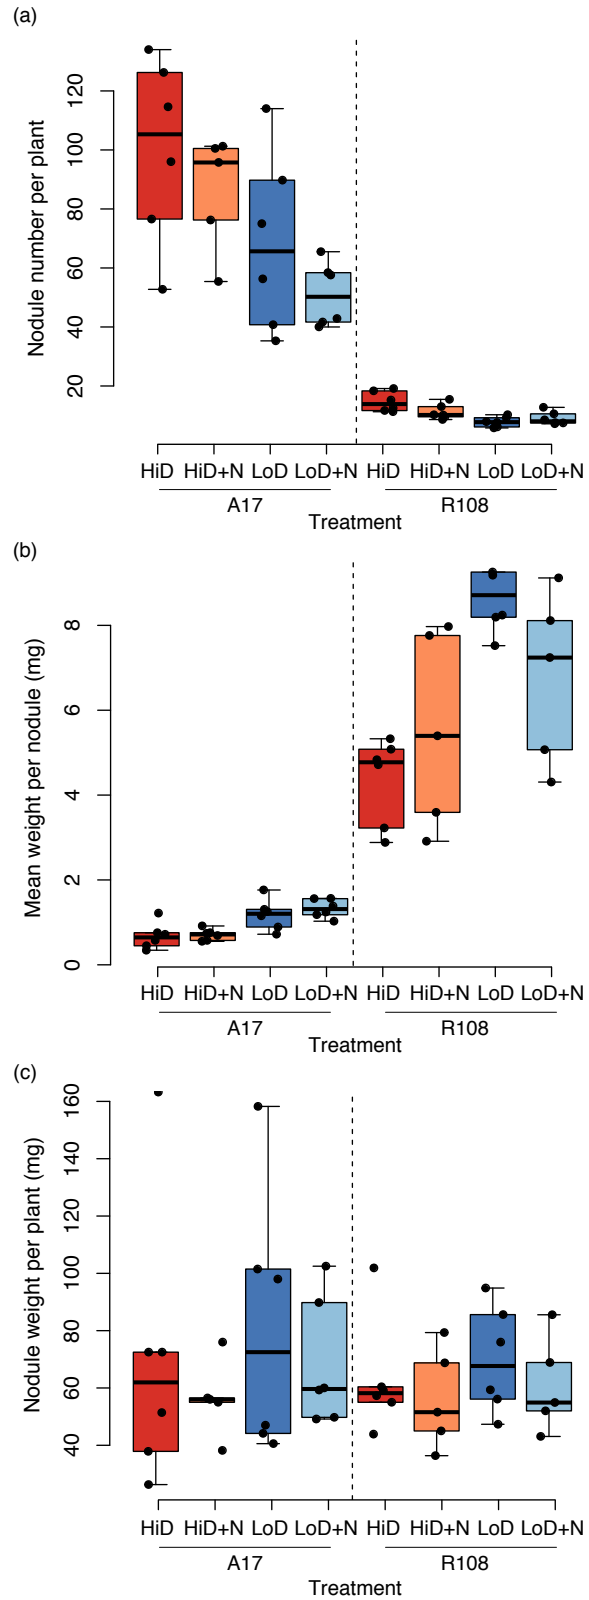

693 Figure 4: Rank order of relative strain  
694 frequencies in the nodule communities were  
695 a) identical when plants were inoculated with  
696 either the 3-strain (C3) or 68-strain (C68)  
697 community, and b) b) nearly identical when  
698 inoculated with either the 8-strain (C8) or C68  
699 community. Ranks were determined based on  
700 mean strain frequency across 5 (C3 and C8) or  
701 6 (C68) replicates for A17 (triangles) and  
702 R108 (circles).  
703

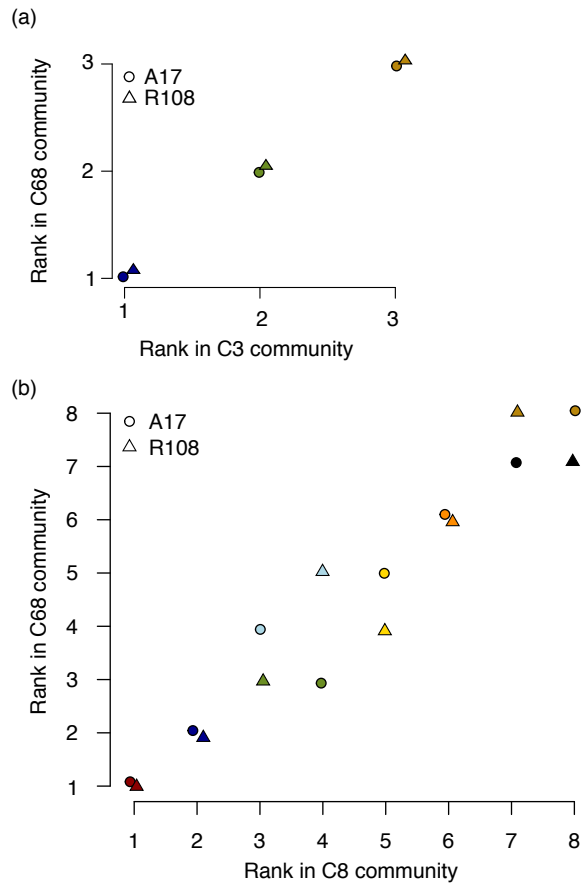

Source: https://biorxiv.org/content/10.1101/2020.11.20.392183v1.full.pdf
