# Supplementary material for: Host-associated rhizobia fitness: Dependence on nitrogen, density, community complexity, and legume genotype
Source: bioRxiv or medRxiv preprint supplement (doi:10.1101/2020.11.20.392183), 2022-03-24

1 *Supplemental Information for:*

2

3 Host-associated rhizobia fitness: Dependence on nitrogen, density, community complexity, and  
4 legume genotype

5

6 Liana T. Burghardt,<sup>a,b,#,\*</sup> Brendan Epstein,<sup>a</sup> Michelle Hoge,<sup>a</sup> Diana Trujillo,<sup>c</sup> and Peter Tiffin<sup>a</sup>

7

8 <sup>a</sup>Department of Plant and Microbial Biology, University of Minnesota, St. Paul, Minnesota

9 <sup>b</sup>Plant Science Department, The Pennsylvania State University, University Park, Pennsylvania

10 <sup>c</sup>Department of Plant Pathology, University of Minnesota, St. Paul, Minnesota

11 Supplemental Table S1: Shannon diversity in nodules is influenced by inoculum density  
 12 (Density) and nitrogen addition (Nitrogen) in A17 but not R108. Full ANOVA model with both  
 13 hosts (top) and separate models for each host (bottom). For each term, we show degrees of  
 14 freedom (df), model sum of squares (Sum Sq.) and *p* value. For the full model, we also include  
 15 F-values.

| Best Hosts                | Df | Sum Sq. | F value          | 16               |                        |
|---------------------------|----|---------|------------------|------------------|------------------------|
|                           |    |         |                  | <i>p</i>         | 17                     |
| Host                      | 1  | 1.07    | 44.0             | <b>&lt;0.001</b> | 18                     |
| Density                   | 1  | 0.25    | 10.1             | <b>0.0039</b>    | 19                     |
| Nitrogen                  | 1  | 0.037   | 1.5              | 0.23             | 20                     |
| Host x Density            | 1  | 0.32    | 13.1             | <b>0.001</b>     | 21                     |
| Host x Nitrogen           | 1  | 0.057   | 2.3              | 0.14             | 22                     |
| Density x Nitrogen        | 1  | 0.052   | 2.1              | 0.15             | 23                     |
| Host x Density x Nitrogen | 1  | 0.000   | 0.002            | 0.97             | 24                     |
| Residuals                 | 40 | 0.97    |                  |                  | 25                     |
|                           |    |         |                  |                  | 26                     |
|                           |    |         |                  |                  | 27                     |
|                           |    | A17     |                  | R108             | 28                     |
|                           | Df | Sum Sq. | <i>p</i>         | Sum Sq.          | <i>p</i> <sup>29</sup> |
| Density                   | 1  | 0.56    | <b>&lt;0.001</b> | 0.0024           | 0.78                   |
| Nitrogen                  | 1  | 0.092   | <b>0.039</b>     | 0.0011           | 0.85                   |
| Density x Nitrogen        | 1  | 0.024   | 0.27             | 0.027            | 0.35                   |
| Residuals                 | 20 | 0.38    |                  | 0.60             |                        |

30 Supplemental Table S2: Predicted host benefit in nodules is strongly affected by inoculum  
 31 Density with both A17 and R108 hosts, whereas the effect of Nitrogen addition is greater in A17  
 32 that R108. Full ANOVA model with both hosts (top) and separate models for each host (bottom).  
 33  
 34

| Bost Hosts                | Df | Sum Sq. | F value | <sup>35</sup><br><del><i>p</i></del> <sub>36</sub> |
|---------------------------|----|---------|---------|----------------------------------------------------|
| Host                      | 1  | 0.45    | 382     | <b>&lt;0.001</b>                                   |
| Density                   | 1  | 0       | 0.02    | 0.88                                               |
| Nitrogen                  | 1  | 0       | 0.05    | 0.82                                               |
| Host x Density            | 1  | 0.041   | 35.2    | <b>&lt;0.001</b>                                   |
| Host x Nitrogen           | 1  | 0.005   | 4.58    | <b>0.038</b>                                       |
| Density x Nitrogen        | 1  | 0.005   | 3.96    | 0.054                                              |
| Host x Density x Nitrogen | 1  | 0       | 0.38    | 0.54                                               |
| Residuals                 | 40 | 0.047   |         | 45                                                 |

46

|                    | A17 |         |                  | R108   |                                   | <sup>47</sup><br><del><i>p</i></del> <sub>48</sub> |
|--------------------|-----|---------|------------------|--------|-----------------------------------|----------------------------------------------------|
|                    | Df  | Sum Sq. | <i>P</i>         | Sum Sq | <del><i>p</i></del> <sub>49</sub> |                                                    |
| Density            | 1   | 0.022   | <b>&lt;0.001</b> | 0.02   | <b>0.003</b>                      |                                                    |
| Nitrogen           | 1   | 0.003   | <b>0.03</b>      | 0.002  | 0.28                              |                                                    |
| Density x Nitrogen | 1   | 0.001   | 0.19             | 0.004  | 0.147                             |                                                    |
| Residuals          | 20  | 0.012   |                  | 0.035  |                                   |                                                    |

53 Supplemental Table S3: The influence of nitrogen addition (Nitrogen), inoculum density  
 54 (Density), and host genotype (Host) on nodule and plant traits (Trait~Host\*Density\*Nitrogen).  
 55 For each term, we show model sum of squares and *P* value category (\*\*\**p* < 0.001, \*\* *p* < 0.01, \*  
 56 *p* < .05, • *p* < 0.1). For the three traits with significant interactions in a full ANOVA model we ran  
 57 sub models for each host separately (bottom). There 39 residual degrees of freedom for each full  
 58 model and 19 for each sub-model.  
 59

| Terms                 | Nodule Number per plant | Weight per Nodule | Nodule weight per plant | Veg. weight per plant | Root weight per plant | Root: Shoot  |
|-----------------------|-------------------------|-------------------|-------------------------|-----------------------|-----------------------|--------------|
| Host                  | <b>50030***</b>         | <b>340***</b>     | 547                     | <b>299979***</b>      | <b>453088***</b>      | 0.1          |
| Density               | <b>4169**</b>           | <b>36***</b>      | 801                     | 15823                 | 891                   | 0.1          |
| Nitrogen              | <i>889•</i>             | 0.4               | 1302                    | 18764                 | 2407                  | 0.2          |
| Host:Density          | <b>2451**</b>           | <b>18**</b>       | 83                      | 5566                  | 25602                 | <i>0.4•</i>  |
| Host:Nitrogen         | 639                     | 1                 | 96                      | 14848                 | 13797                 | <b>0.6**</b> |
| Density:Nitrogen      | 2                       | <b>7*</b>         | 1                       | 461                   | 1115                  | 0            |
| Host:Density:Nitrogen | 47                      | <b>8*</b>         | 8                       | 1808                  | 10561                 | 0.1          |
| Residuals             | 11725                   | 53                | 32078                   | 292074                | 389082                | 4.1          |

60

| Terms            | Nodule Number per plant |               | Weight per Nodule |              | Root:Shoot   |      |
|------------------|-------------------------|---------------|-------------------|--------------|--------------|------|
|                  | A17                     | R108          | A17               | R108         | A17          | R108 |
| Density          | <b>6563**</b>           | <b>123***</b> | <b>2***</b>       | <b>52***</b> | <i>0.4•</i>  | 0.1  |
| Nitrogen         | 1454                    | 8             | 0                 | 1            | <b>0.8**</b> | 0    |
| Density:Nitrogen | 16                      | <b>33*</b>    | 0                 | <b>15*</b>   | 0            | 0.1  |
| Residuals        | 11594                   |               | 1.5               | 53           | 2.7          | 1.4  |

61

62 Supplemental Table S4: ‘root weight per plant’ weight per nodule’ increase with community  
 63 complexity in R108 but not A17 hosts. In contrast, ‘nodule weight per plant’ was not affected by  
 64 host genotype or community complexity. Top) Results from a full model  
 65 (trait~host+complexity+ host\*complexity). Bottom) Results from sub-models for each host for  
 66 ‘weight per nodule’ and ‘root weight per plant’. For each term, we show model sum of squares  
 67 and *p* value category (\*\**p*<0.001, \*\* *p* <0.01, \* *p* <.05, • *p* < 0.1)  
 68

| Terms           | DF | Nodule Number per plant | Weight per Nodule | Nodule Weight per plant | Vegetative weight per plant | Root weight per plant | Root: Shoot ratio |
|-----------------|----|-------------------------|-------------------|-------------------------|-----------------------------|-----------------------|-------------------|
| Host            | 1  | <b>76295***</b>         | <b>117.9***</b>   | 0.000                   | <b>0.303***</b>             | <b>0.435***</b>       | 0.003             |
| Complexity      | 1  | 409                     | <b>3.06*</b>      | 0.001                   | 0.009                       | <i>0.039•</i>         | 0.105             |
| Host:Complexity | 1  | 856                     | <b>3.14*</b>      | 0.000                   | 0.000                       | 0.002                 | 0.000             |
| Residual        | 56 | 17443                   | 29.7              | 0.028                   | 0.227                       | 0.548                 | 6.413             |

69  
70

| Terms      | DF | Weight per Nodule |                | Root weight per plant |                |
|------------|----|-------------------|----------------|-----------------------|----------------|
|            |    | A17               | R108           | A17                   | R108           |
| Complexity | 1  | 0.00024           | <b>6.2006*</b> | .1205                 | <b>0.0277*</b> |
| Residual   | 28 | 1.34              | 53             | .3769                 | 0.1713         |

71

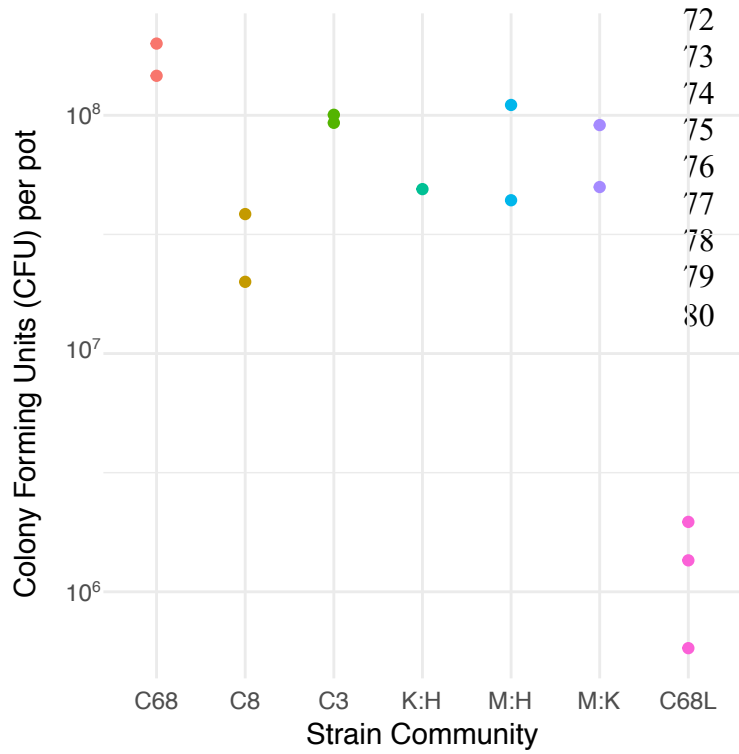

72 Supplemental Figure S1: Densities of  
 73 initial inoculum communities applied  
 74 per pot as measured by dilution plating  
 75 and counts of colony-forming units.  
 76 Since each pot contained ~10-12  
 77 plants, each plant received ~10<sup>7</sup> cells  
 78 in high-density treatments and ~10<sup>5</sup>  
 79 cells in the low-density treatment.  
 80

81 Supplemental Figure S2: Community composition summarized across replicates for each  
 82 Host\*Nitrogen\*Density treatment. Strains colors designate the focal strains used in the reduced  
 83 community complexity experiment.  
 84

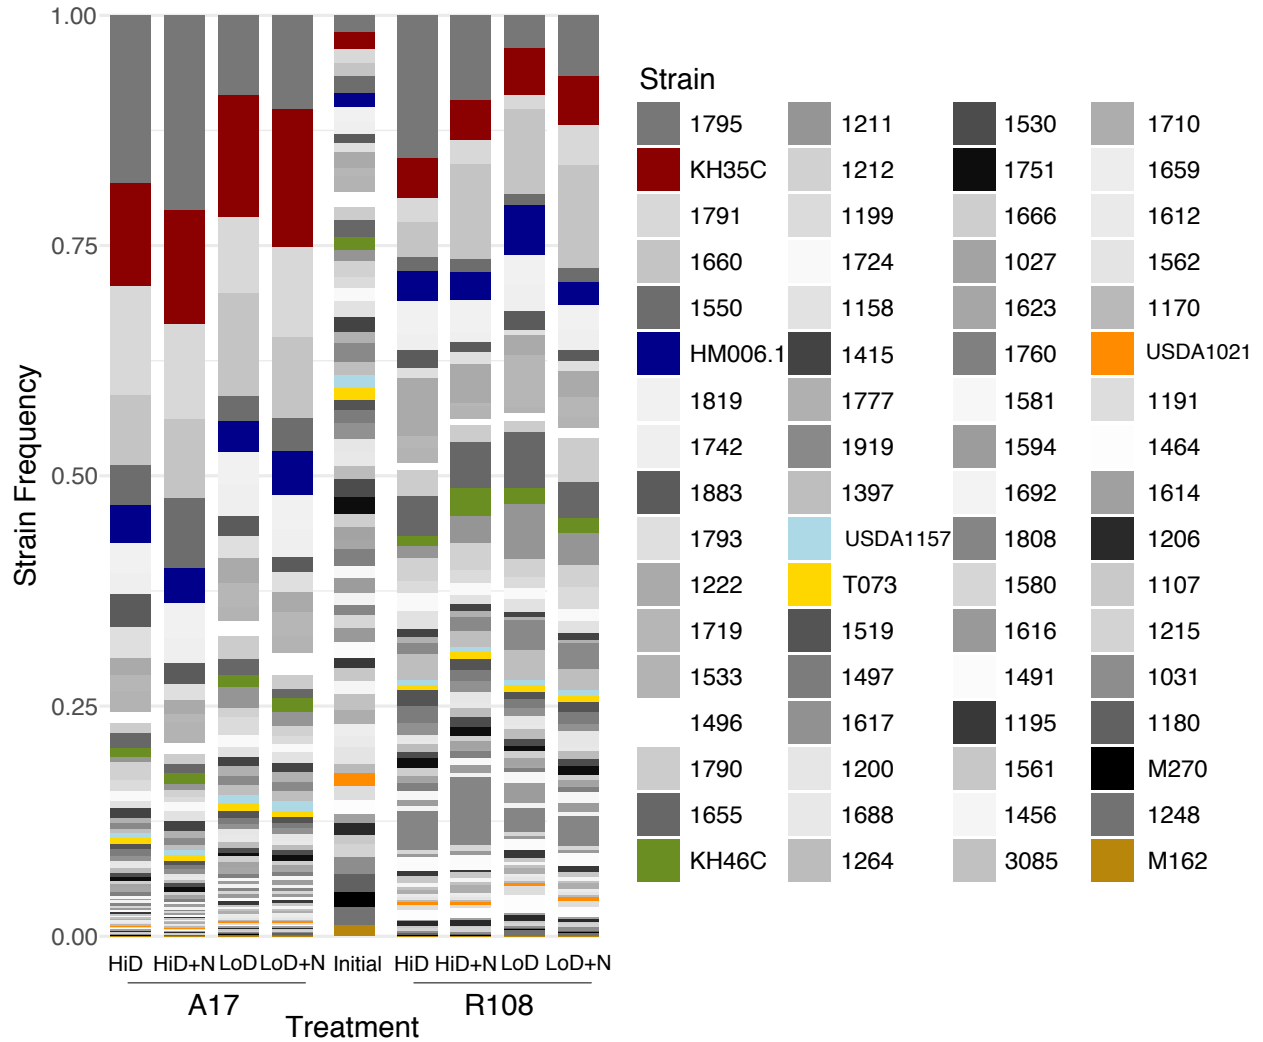

85

86 Figure S3: Visualization of the first two axes from an RDA analysis of the influence of inoculum  
87 density and nitrogen addition on strain relative fitness separated by host. Density and Nitrogen  
88 have considerably larger effects on the strain composition of A17 nodules (a) than R108 (b)  
89 nodules (full statistical results in Table 2).  
90

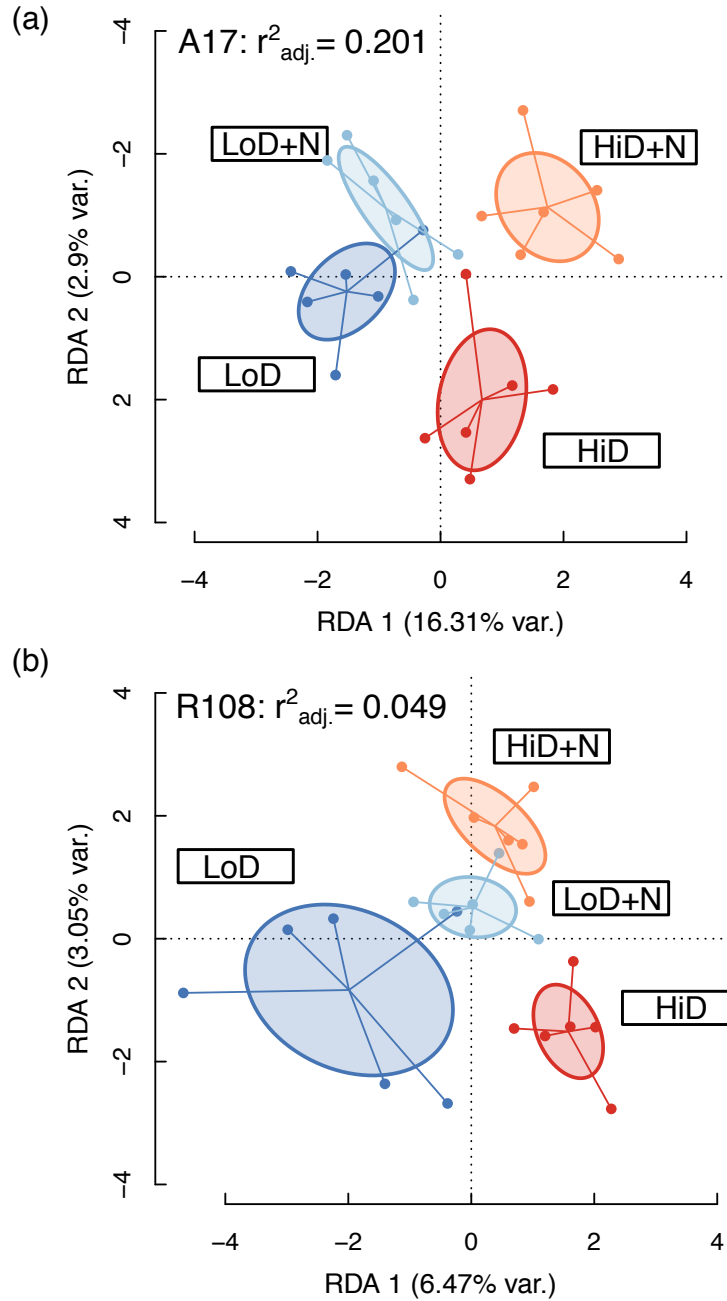



92 Supplemental Figure S4: Principal Component Analysis (PCA) of strain relative fitness  
93 combined across hosts (a) and for A17(b) and R108 (c) alone.  
94

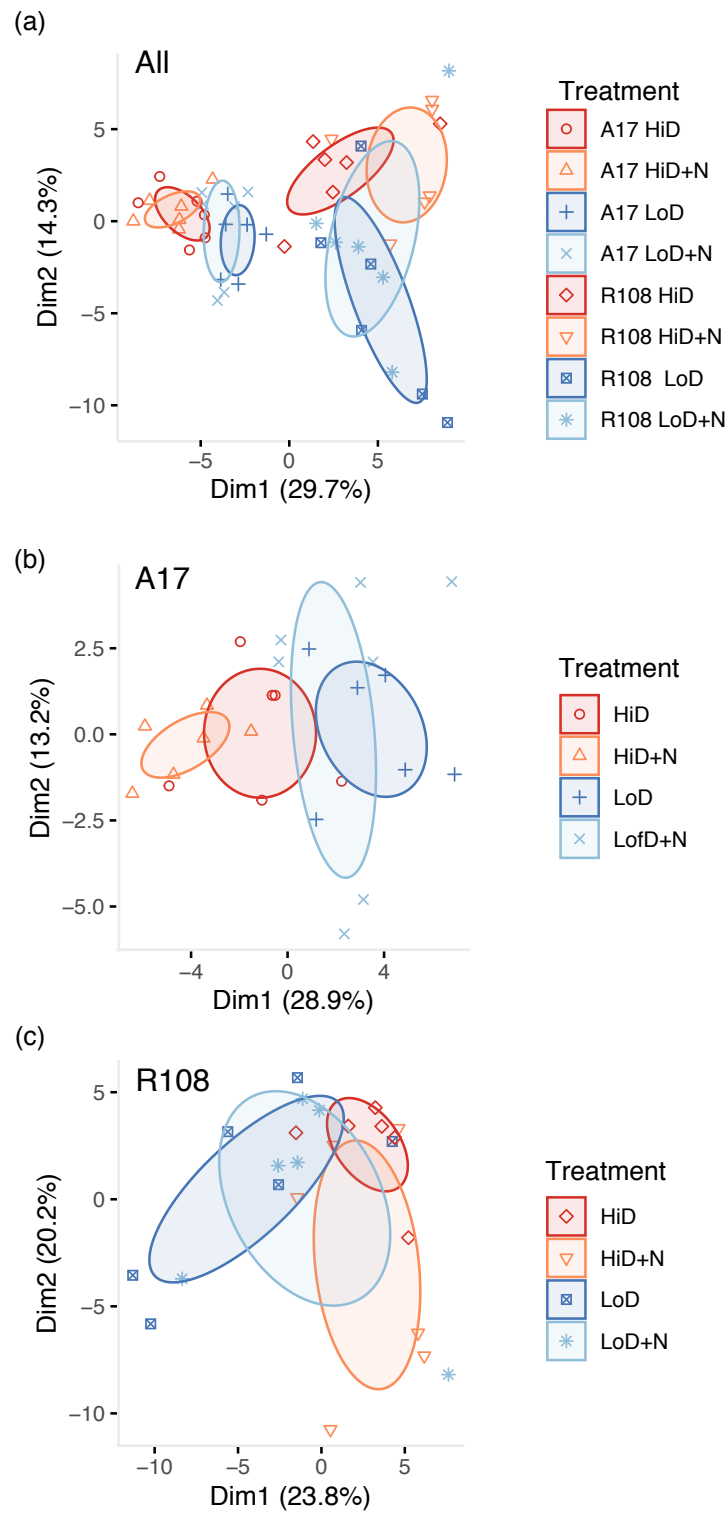

96 Supplemental Figure S5: Relative frequency of each strain in pairwise and more complex  
 97 communities A) Pairwise communities of the three focal strains B) C3 strains in C8 and C68  
 98 communities, and C) C8 strains in the C68 community and C8 alone.  
 99

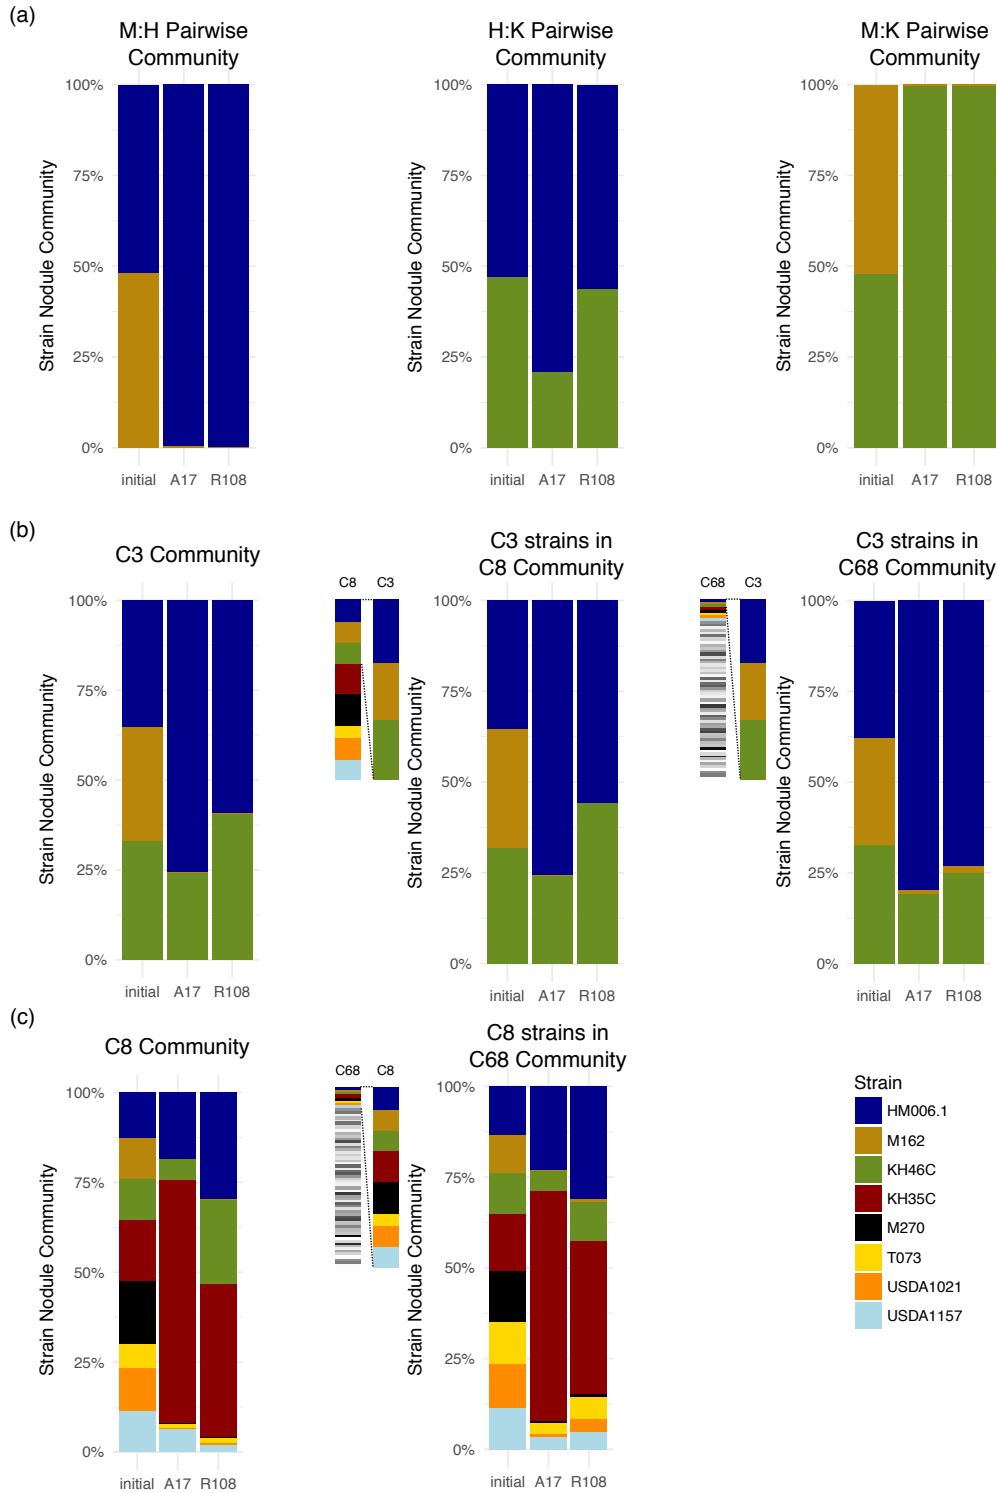

101 Supplemental Figure S6: Relative frequency of each strain in each replicate in pairwise (a-c) and  
 102 more complex communities three strain (d) and eight strain communities (e).  
 103

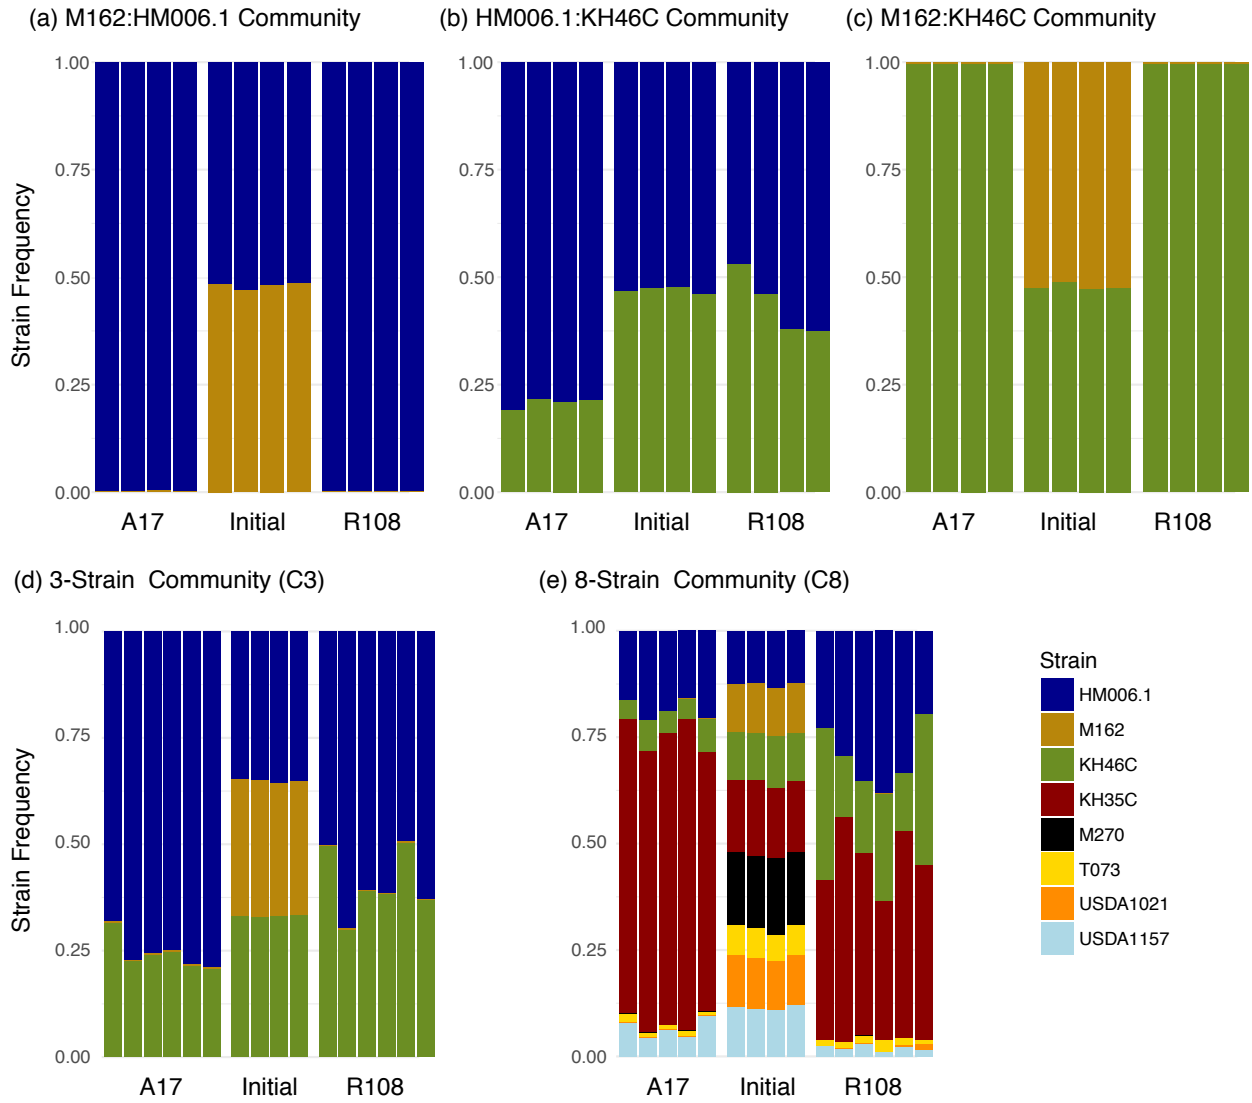

104

105 Supplemental Figure S7: Plant biomass traits for Nitrogen x Density experiment including root:  
106 shoot ratio (a), dry root biomass (b), and dry shoot biomass (c). ANOVA model results can be  
107 found in Supplemental Table S3.

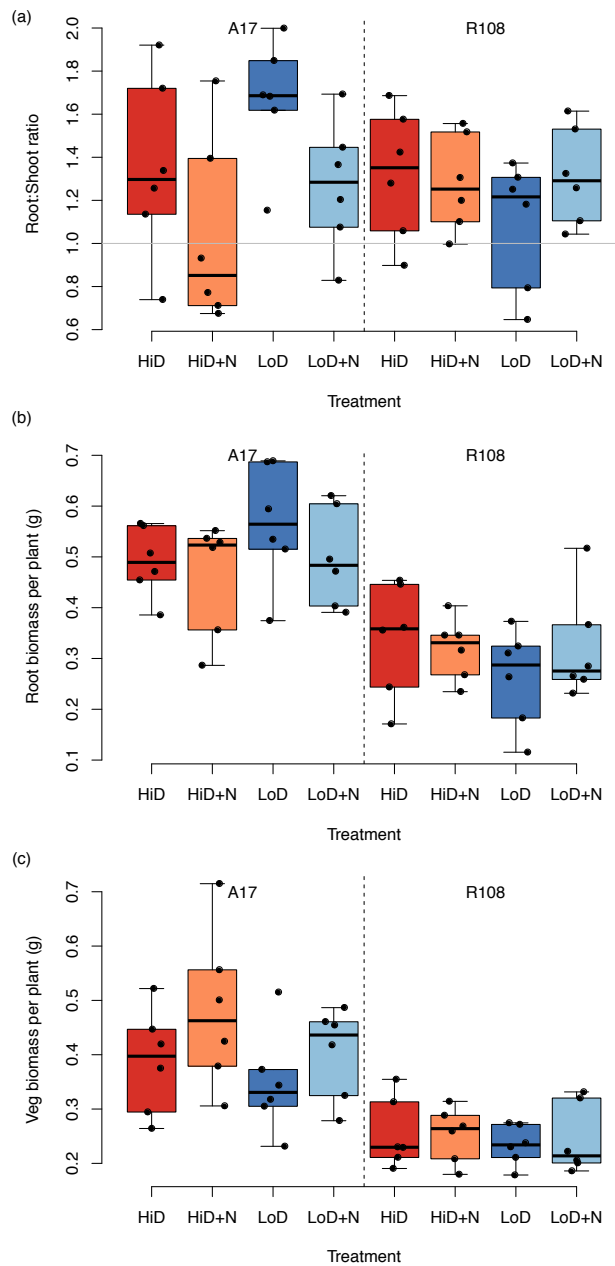

109 Supplemental Figure S8: Plant phenotypes when A17 and R108 hosts were grown with  
 110 increasingly complex strain communities: 68 strains (C68), eight strains (C8), three strains (C3),  
 111 and two strains (H:K, M:H, and M:K). Statistical tests on all six traits can be found in  
 112 Supplemental Table S4.

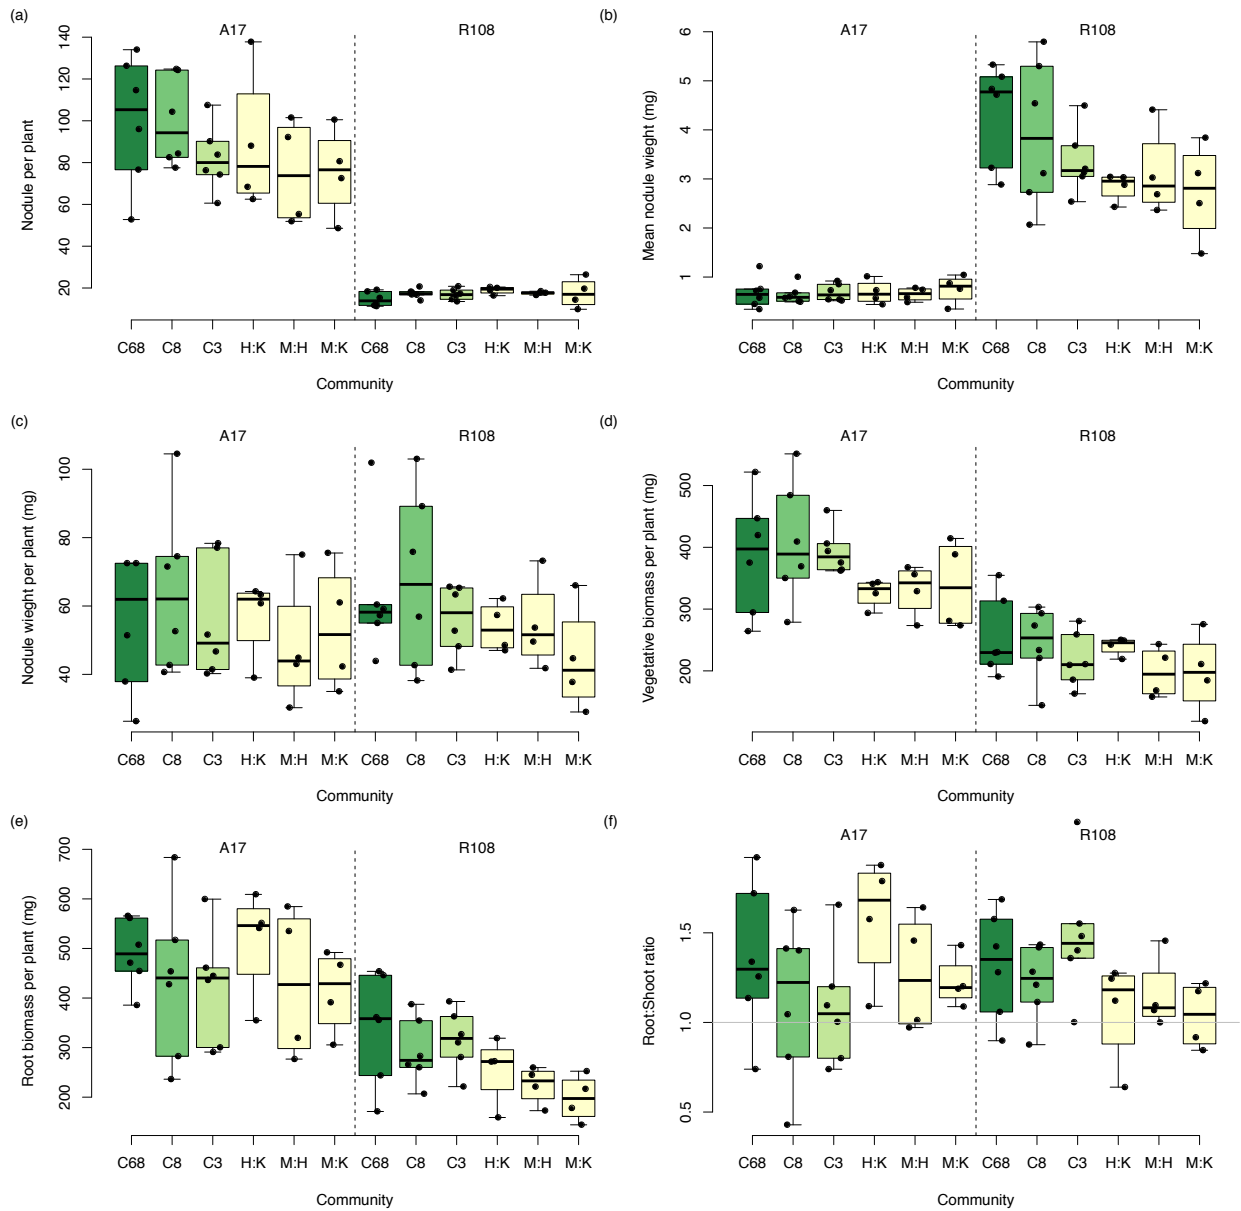

113  
 114  
 115

116 Supplemental Figure S9: Nodule numbers in sequenced pool sizes for (a) the Nitrogen by  
 117 Density experiment (all plants inoculated with the C68 community) and (b) plants from the  
 118 community complexity experiment. For R108, nodules were harvested and pooled from all plants  
 119 in a pot, but due to the large numbers of nodules on A17 only nodules from ~ half of A17 plants  
 120 were harvested per pot.

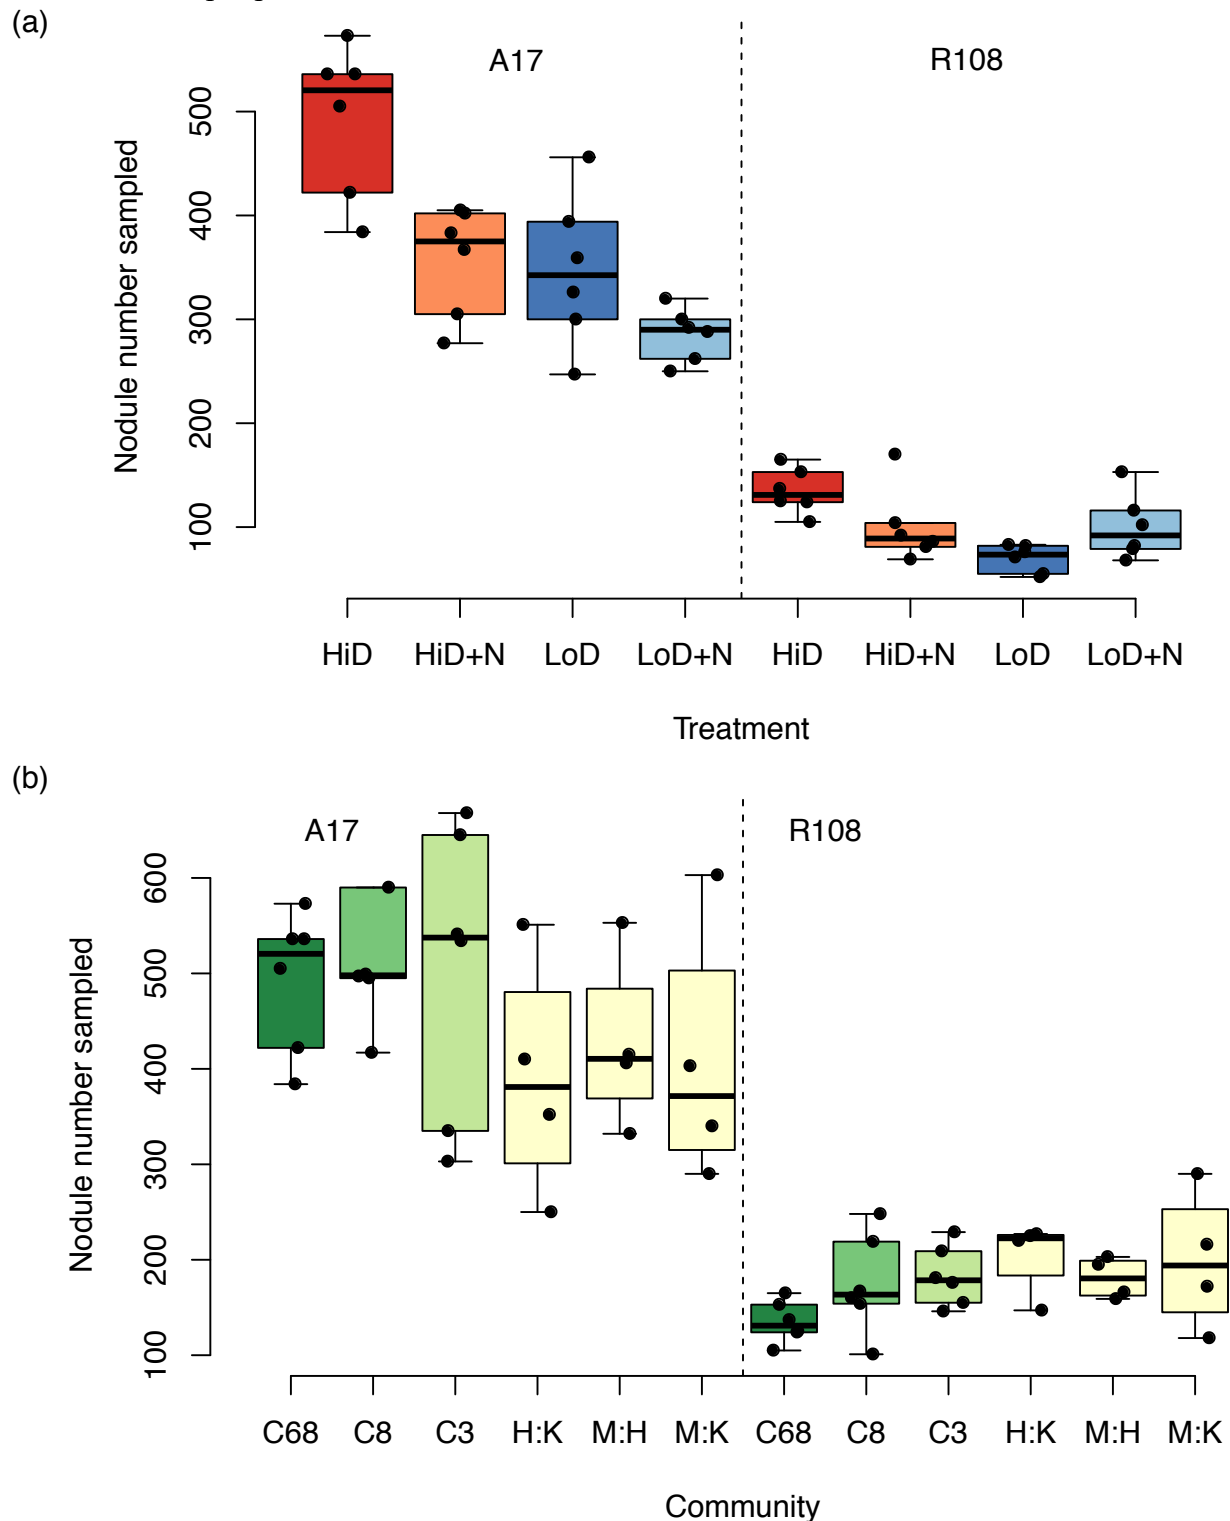

Supplement: Supplementary file [file media-1.pdf]
